# Supplementary material for: Effectiveness of homologous or heterologous immunization regimens against SARS-CoV-2 after two doses of inactivated COVID-19 vaccine: A systematic review and meta-analysis
Source: PubMed Central journal article supplement — Hum Vaccin Immunother. 2023 Jun 21;19(2):2221146. doi: 10.1080/21645515.2023.2221146 (PMC10288895; doi:10.1080/21645515.2023.2221146), 2023-06-21

**Effectiveness of homologous or heterologous immunization regimens with  
inactivated COVID-19 vaccine against SARS-CoV-2: a systematic review and  
meta-analysis**

**Supplementary materials**

## Table of Contents

|                                                                                                            |    |
|------------------------------------------------------------------------------------------------------------|----|
| Supplement table 1. Search strategy. ....                                                                  | 1  |
| Supplement table 2A. Characteristics of included studies in this systematic review and meta-analysis. .... | 3  |
| Supplement table 2B. Characteristics of included studies in this systematic review and meta-analysis. .... | 12 |
| Supplement table 3. Interpretation of primary clinical outcomes. ....                                      | 21 |
| Supplement table 4. Risk of bias for included randomized control trails. ....                              | 22 |
| Supplement table 5. Risk of bias for included cohort studies. ....                                         | 23 |
| Supplement table 6. Risk of bias for included case-control studies. ....                                   | 25 |
| Supplement table 7. Vaccine effectiveness of immunization regimens included in the study. ....             | 26 |
| Supplement figure 1. Vaccine effectiveness against COVID-19 infection. ....                                | 29 |
| Supplement figure 2. Vaccine effectiveness against COVID-19 related hospitalization. ....                  | 30 |
| Supplement figure 3. Vaccine effectiveness against COVID-19 related ICU admission. ....                    | 31 |
| Supplement figure 4. Vaccine effectiveness against COVID-19 related death. ....                            | 32 |
| Supplement figure 5. Vaccine effectiveness against severe COVID-19 outcomes. ....                          | 33 |
| Supplement table 8. Subgroup analysis of follow-up times. ....                                             | 34 |
| Supplement table 9. Vaccine effectiveness of immunization regimens against SARS-CoV-2 variants. ....       | 36 |
| Supplement table 10. Vaccine effectiveness of immunization regimens against Alpha and Gamma variants. .... | 41 |
| Supplement table 11. Vaccine effectiveness of immunization regimens against Delta variants. ....           | 42 |
| Supplement table 12. Vaccine effectiveness of immunization regimens against Omicron variants. ....         | 43 |

|                                                                      |    |
|----------------------------------------------------------------------|----|
| Supplement table 13. Subgroup analysis of different populations..... | 44 |
| Supplement figure 6. Funnel plots to assess publication bias.....    | 46 |
| Supplement figure 7. Sensitivity analysis.....                       | 49 |

**Supplement table 1. Search strategy.**

| No.                   | Terms                                                                                                                                                                                                                                                                                                                                                                                                                                                                                                                                                                                                          | N          |
|-----------------------|----------------------------------------------------------------------------------------------------------------------------------------------------------------------------------------------------------------------------------------------------------------------------------------------------------------------------------------------------------------------------------------------------------------------------------------------------------------------------------------------------------------------------------------------------------------------------------------------------------------|------------|
| <b>PubMed</b>         |                                                                                                                                                                                                                                                                                                                                                                                                                                                                                                                                                                                                                |            |
| #1                    | COVID-19[MeSH Terms] OR SARS-CoV-2[MeSH Terms] OR COVID-19 OR SARS-CoV-2 OR COVID19 OR COVID-2019 OR 2019-nCoV OR 2019nCoV OR CoV 2 OR CoV2 OR SARS-CoV-2019 OR SARS-CoV-19 OR SARSCoV2 OR SARS2 OR coronavir* OR corona virus OR nCoV                                                                                                                                                                                                                                                                                                                                                                         | 324,230    |
| #2                    | CoronaVac OR Picovacc OR Sinovac OR Sinopharm OR Covilo OR HB02 OR WIV04 OR BBIBP* OR BIBP* OR WIBP* OR inactivated OR killed OR inactive                                                                                                                                                                                                                                                                                                                                                                                                                                                                      | 511,933    |
| #3                    | effic* OR effec*                                                                                                                                                                                                                                                                                                                                                                                                                                                                                                                                                                                               | 11,850,474 |
| #4                    | vaccines [MeSH Terms]) OR (vaccin*                                                                                                                                                                                                                                                                                                                                                                                                                                                                                                                                                                             | 492,799    |
| #5                    | <b>#1 AND #2 AND #3 AND #4</b>                                                                                                                                                                                                                                                                                                                                                                                                                                                                                                                                                                                 | 1,576      |
| <b>Web of Science</b> |                                                                                                                                                                                                                                                                                                                                                                                                                                                                                                                                                                                                                |            |
| #1                    | TI=(COVID-19 OR SARS-CoV-2 OR COVID19 OR COVID-2019 OR 2019-nCoV OR 2019nCoV OR CoV 2 OR CoV2 OR SARS-CoV-2019 OR SARS-CoV-19 OR SARSCoV2 OR SARS2 OR coronavir* OR corona virus OR nCoV) OR AB=(COVID-19 OR SARS-CoV-2 OR COVID-19 OR SARS-CoV-2 OR COVID19 OR COVID-2019 OR 2019-nCoV OR 2019nCoV OR CoV 2 OR CoV2 OR SARS-CoV-2019 OR SARS-CoV-19 OR SARSCoV2 OR SARS2 OR coronavir* OR corona virus OR nCoV)                                                                                                                                                                                               | 460,863    |
| #2                    | TI= (inactivated OR killed OR inactive OR CoronaVac OR Picovacc OR Sinovac OR BBIBP* OR BIBP* OR WIBP* OR Sinopharm OR Covilo OR HB02 OR WIV04) OR AB= (inactivated OR killed OR inactive OR CoronaVac OR Picovacc OR Sinovac OR BBIBP* OR BIBP* OR WIBP* OR Sinopharm OR Covilo OR HB02 OR WIV04)                                                                                                                                                                                                                                                                                                             | 771,950    |
| #3                    | TI= (effic* OR effec*) OR AB= (effic* OR effec*)                                                                                                                                                                                                                                                                                                                                                                                                                                                                                                                                                               | 40,173,678 |
| #4                    | TI= (vaccin*) OR AB= (vaccin*)                                                                                                                                                                                                                                                                                                                                                                                                                                                                                                                                                                                 | 578,375    |
| #5                    | <b>#1 AND #2 AND #3 AND #4</b>                                                                                                                                                                                                                                                                                                                                                                                                                                                                                                                                                                                 | 1,467      |
| <b>Embase</b>         |                                                                                                                                                                                                                                                                                                                                                                                                                                                                                                                                                                                                                |            |
| #1                    | 'coronavirus disease 2019'/exp                                                                                                                                                                                                                                                                                                                                                                                                                                                                                                                                                                                 | 264,990    |
| #2                    | 'severe acute respiratory syndrome coronavirus 2'/exp                                                                                                                                                                                                                                                                                                                                                                                                                                                                                                                                                          | 78,371     |
| #3                    | ('COVID-19':ti OR 'SARS-CoV-2':ti OR 'COVID-19':ti OR 'SARS-CoV-2':ti OR 'COVID19':ti OR 'COVID-2019':ti OR '2019-nCoV':ti OR '2019nCoV':ti OR 'CoV 2':ti OR 'CoV2':ti OR 'SARS-CoV-2019':ti OR 'SARS-CoV-19':ti OR 'SARSCoV2':ti OR 'SARS2':ti OR 'coronavir*':ti OR 'corona virus':ti OR 'nCoV':ti) OR ('COVID-19':ab OR 'SARS-CoV-2':ab OR 'COVID-19':ab OR 'SARS-CoV-2':ab OR 'COVID19':ab OR 'COVID-2019':ab OR '2019-nCoV':ab OR '2019nCoV':ab OR 'CoV 2':ab OR 'CoV2':ab OR 'SARS-CoV-2019':ab OR 'SARS-CoV-19':ab OR 'SARSCoV2':ab OR 'SARS2':ab OR 'coronavir*':ab OR 'corona virus':ab OR 'nCoV':ab) | 332,021    |

|                         |                                                                                                                                                                                                                                                                                                                                                                                                                                |            |
|-------------------------|--------------------------------------------------------------------------------------------------------------------------------------------------------------------------------------------------------------------------------------------------------------------------------------------------------------------------------------------------------------------------------------------------------------------------------|------------|
| #4                      | #1 OR #2 OR #3                                                                                                                                                                                                                                                                                                                                                                                                                 | 359,393    |
| #5                      | 'inactivated vaccine'/exp                                                                                                                                                                                                                                                                                                                                                                                                      | 7,209      |
| #6                      | 'coronavac'/exp                                                                                                                                                                                                                                                                                                                                                                                                                | 1,278      |
| #7                      | 'covilo'/exp                                                                                                                                                                                                                                                                                                                                                                                                                   | 525        |
| #8                      | 'wibp-cov vaccine'/exp                                                                                                                                                                                                                                                                                                                                                                                                         | 66         |
| #9                      | ('inactivated':ti OR 'killed':ti OR 'inactive':ti OR 'CoronaVac':ti OR 'Picovacc':ti OR 'Sinovac':ti OR 'BBIBP*':ti OR 'BIBP*':ti OR 'WIBP*':ti OR 'Sinopharm':ti OR 'Covilo':ti OR 'HB02':ti OR 'WIV04':ti) OR ('inactivated':ab OR 'inactive':ab OR 'killed':ab OR 'CoronaVac':ab OR 'Picovacc':ab OR 'Sinovac*':ab OR 'BBIBP*':ab OR 'BIBP*':ab OR 'WIBP*':ab OR 'Sinopharm*':ab OR 'Covilo':ab OR 'HB02':ab OR 'WIV04':ab) | 275,406    |
| #10                     | #5 OR #6 OR #7 OR #8 OR #9                                                                                                                                                                                                                                                                                                                                                                                                     | 278,646    |
| #11                     | ('effic*':ti OR 'effec*':ti) OR ('effic*':ab OR 'effec*':ab)                                                                                                                                                                                                                                                                                                                                                                   | 11,543,606 |
| #12                     | 'vaccine'/exp                                                                                                                                                                                                                                                                                                                                                                                                                  | 416,426    |
| #13                     | 'vaccination'/exp                                                                                                                                                                                                                                                                                                                                                                                                              | 229,608    |
| #14                     | 'vaccin*':ti OR 'vaccin*':ab                                                                                                                                                                                                                                                                                                                                                                                                   | 461,746    |
| #15                     | #12 OR #13 OR #14                                                                                                                                                                                                                                                                                                                                                                                                              | 602,465    |
| #16                     | #4 AND #10 AND #11 AND #15                                                                                                                                                                                                                                                                                                                                                                                                     | 1,707      |
| <b>Cochrane Library</b> |                                                                                                                                                                                                                                                                                                                                                                                                                                |            |
| #1                      | Mesh descriptor: [COVID-19] explode all trees                                                                                                                                                                                                                                                                                                                                                                                  | 2,317      |
| #2                      | Mesh descriptor: [SARS-CoV-2] explode all trees                                                                                                                                                                                                                                                                                                                                                                                | 1,127      |
| #3                      | COVID-19 OR SARS-CoV-2 OR COVID19 OR COVID-2019 OR 2019 nCoV OR 2019nCoV OR CoV 2 OR CoV2 OR SARS-CoV-2019 OR SARS-CoV-19 OR SARSCoV2 OR SARS2 OR coronavir* OR corona virus OR nCoV                                                                                                                                                                                                                                           | 13,429     |
| #4                      | #1 OR #2 OR #3                                                                                                                                                                                                                                                                                                                                                                                                                 | 13,430     |
| #5                      | Mesh descriptor: [Vaccines, Inactivated] explode all trees                                                                                                                                                                                                                                                                                                                                                                     | 1,043      |
| #6                      | CoronaVac OR Picovacc OR Sinovac OR Sinopharm OR Covilo OR HB02 OR WIV04 OR BBIBP* OR BIBP* OR WIBP* OR inactivated OR killed OR inactive                                                                                                                                                                                                                                                                                      | 10,798     |
| #7                      | #5 OR #6                                                                                                                                                                                                                                                                                                                                                                                                                       | 10,798     |
| #8                      | Mesh descriptor: [Vaccines Efficacy] explode all trees                                                                                                                                                                                                                                                                                                                                                                         | 17         |
| #9                      | effic* OR effec*                                                                                                                                                                                                                                                                                                                                                                                                               | 1,273,561  |
| #10                     | #8 OR #9                                                                                                                                                                                                                                                                                                                                                                                                                       | 1,273,561  |
| #11                     | vaccin*                                                                                                                                                                                                                                                                                                                                                                                                                        | 30,130     |
| #12                     | #4 AND #7 AND #10 AND #11                                                                                                                                                                                                                                                                                                                                                                                                      | 166        |

**Supplement table 2A. Characteristics of included studies in this systematic review and meta-analysis.**

| First author   | Publish date | Country              | Study design             | Age (Mean, SD)                                                                                                                                                                                                                                                                                                                                                                                          | Male (%)                                                | Population characteristics                         | Comorbidities, n (%)                                                                                                                                                                                                                                                                                                          | Variants        |
|----------------|--------------|----------------------|--------------------------|---------------------------------------------------------------------------------------------------------------------------------------------------------------------------------------------------------------------------------------------------------------------------------------------------------------------------------------------------------------------------------------------------------|---------------------------------------------------------|----------------------------------------------------|-------------------------------------------------------------------------------------------------------------------------------------------------------------------------------------------------------------------------------------------------------------------------------------------------------------------------------|-----------------|
| Nawal Al Kaabi | 2021.7.6     | United Arab Emirates | Randomized control trial | WIV04 36.2 (9.2)<br>HB02 36.1 (9.3)<br>Alum-only placebo 36.1 (9.3)                                                                                                                                                                                                                                                                                                                                     | Overall 84.4<br>WIV04 84.0<br>HB02 84.5<br>Placebo 84.8 | General population (adults aged 18 years or older) | NA                                                                                                                                                                                                                                                                                                                            | NA              |
| Alejandro Jara | 2021.9.2     | Chile                | Prospective cohort study | 16–19 years<br>Unvaccinated n=670,451<br>Vaccinated n=30,033<br>20–29 years<br>Unvaccinated n=1,655,595<br>Vaccinated n=306,227<br>30–39 years<br>Unvaccinated n=1,446,544<br>Vaccinated n=361,781<br>40–49 years<br>Unvaccinated n=851,622<br>Vaccinated n=406,661<br>50–59 years<br>Unvaccinated n=434,694<br>Vaccinated n=838,602<br>60–69 years<br>Unvaccinated n=221,738<br>Vaccinated n=1,102,509 | Overall 46.1<br>Vaccinated 42.0<br>Unvaccinated 49.3    | General population (adults aged 16 years or older) | Chronic kidney disease, diabetes, cardiovascular disease, stroke, chronic obstructive pulmonary disease, hematologic disease, autoimmune disease, human immunodeficiency virus infection, and Alzheimer’s disease and other dementias.<br>No. of comorbidities $\geq 1$<br>Unvaccinated n=1,024,044<br>Vaccinated n=2,134,862 | Gamma and Alpha |

|                        |           |                      |                                  |                                                                                                                             |                                                            |                                                               |                                                                                                                                                         |                |
|------------------------|-----------|----------------------|----------------------------------|-----------------------------------------------------------------------------------------------------------------------------|------------------------------------------------------------|---------------------------------------------------------------|---------------------------------------------------------------------------------------------------------------------------------------------------------|----------------|
|                        |           |                      |                                  | 70–79 years<br>Unvaccinated n=111,592<br>Vaccinated n=742,078<br>≥80 years<br>Unvaccinated n=79,492<br>Vaccinated n=385,683 |                                                            |                                                               |                                                                                                                                                         |                |
| Mine Durusu Tanriover  | 2021.7.17 | Turkey               | Randomized control trial         | 18–44 years<br>45–59 years                                                                                                  | NA                                                         | General population (adults aged 18-59 years)                  | Hypertension, cardiovascular disease other than hypertension, chronic respiratory disease, diabetes, malignancy, autoimmune or autoinflammatory disease | NA             |
| Otavio T Ranzani       | 2021.8.20 | Brazil               | Test-negative case-control study | ≥70 years                                                                                                                   | NA                                                         | Elderly population (adults aged 70 years or older)            | Cardiovascular, renal, neurological, haematological, and hepatic, diabetes, chronic respiratory disorder, obesity, or immunosuppression.                | Gamma          |
| Farida Ismail AlHosani | 2022.2.19 | United Arab Emirates | Retrospective cohort study       | 15-19, 20-24, 25-29, 30-34, 35-39, 40-44, 45-49, 50-54, 55-59, 60-64, 65-69, 70-74, 75-79, 80+years                         | Overall 64.1<br>Unvaccinated 77.9<br>Fully vaccinated 54.6 | General population (adults aged 18 years or older)            | NA                                                                                                                                                      | Alpha and Beta |
| Min Kang               | 2022.2.1  | China                | Retrospective cohort study       | Unvaccinated 48.0 (18.1)<br>Fully vaccinated 39.3 (10.5)                                                                    | Overall 54.1<br>Unvaccinated 53.9<br>Fully vaccinated 54.8 | Adult case and close contacts (adults aged 18 years or older) | NA                                                                                                                                                      | Delta (GS)     |
| Thiago Cerqueira-Silva | 2022.7.18 | Brazil               | Test-negative case-control study | 18-59 years<br>60-79 years<br>≥80 years                                                                                     | NA                                                         | General population (adults aged 18 years or older)            | Cardiac disease, diabetes mellitus, obesity, immunosuppression, chronic respiratory disease, and chronic kidney disease.                                | Omicron        |

|                     |            |          |                                  |                                                                                                                                                                                                             |                                                                                                                                                                       |                                                               |                                                                                                                                                                                                                                                                                                                                                                             |             |
|---------------------|------------|----------|----------------------------------|-------------------------------------------------------------------------------------------------------------------------------------------------------------------------------------------------------------|-----------------------------------------------------------------------------------------------------------------------------------------------------------------------|---------------------------------------------------------------|-----------------------------------------------------------------------------------------------------------------------------------------------------------------------------------------------------------------------------------------------------------------------------------------------------------------------------------------------------------------------------|-------------|
| Alejandro Jara      | 2022.6.10  | Chile    | Prospective cohort study         | <p>CoronaVac booster<br/>Female 69.7 (11.9)<br/>Male 69.5 (10.6)</p> <p>BNT162b2 booster<br/>Female 44.8 (14.5)<br/>Male 45.8 (14.7)</p> <p>AZD1222 booster<br/>Female 68.4 (9.36)<br/>Male 67.5 (8.71)</p> | <p>Overall 43.4<br/>Unvaccinated 52.8</p> <p>Three doses of CoronaVac 39.5</p> <p>Two doses of CoronaVac+BNT162b2 38.3</p> <p>Two doses of CoronaVac+AZD1222 44.0</p> | General population (adults aged 16 years or older)            | Chronic kidney disease, diabetes, cardiovascular disease (ie, hypertension, myocardial infarction), stroke, chronic obstructive pulmonary disease, haematological disease (ie, lymphoma, leukaemia, myeloma), autoimmune disease (ie, rheumatoid arthritis, juvenile idiopathic arthritis, systemic lupus erythematosus), HIV, and Alzheimer's disease and other dementias. | Delta (63%) |
| Chao Ma             | 2022.5.3   | China    | Retrospective cohort study       | <p>18–59 years<br/>Unvaccinated n=52<br/>Fully vaccinated n=325</p> <p>≥60 years<br/>Unvaccinated n=14<br/>Fully vaccinated n=6</p>                                                                         | <p>Overall 74.6<br/>Unvaccinated 43.9<br/>Fully vaccinated 80.7</p>                                                                                                   | Adult case and close contacts (adults aged 18 years or older) | NA                                                                                                                                                                                                                                                                                                                                                                          | Delta       |
| Gunay Can           | 2022.4.20  | Turkey   | Retrospective cohort study       | <p>Fully vaccinated 40 (11)<br/>Unvaccinated 35(10)</p>                                                                                                                                                     | <p>Overall 43.5<br/>Fully vaccinated 45.2<br/>Unvaccinated 39.3</p>                                                                                                   | Healthcare workers                                            | NA                                                                                                                                                                                                                                                                                                                                                                          | Alpha (75%) |
| Paskorn Sritipsukho | 2022.2.16  | Thailand | Test-negative case-control study | <p>18-60 years<br/>&gt;60 years</p>                                                                                                                                                                         | NA                                                                                                                                                                    | General population (adults aged 18 years or older)            | Obesity, Cardiovascular diseases, Diabetes mellitus, Chronic lung/airway diseases, Chronic kidney diseases, Malignancy, Cerebrovascular diseases.                                                                                                                                                                                                                           | Delta       |
| Zoltán Vokó         | 2021.11.25 | Hungary  | Observational (cohort) study     | <p>16–24, 25–34, 35–44, 45–54,<br/>55–64, 65–74, 75–84, ≥85 years</p>                                                                                                                                       | <p>Overall 47.4<br/>HB02 44.8<br/>Unvaccinated 47.7</p>                                                                                                               | General population (Hungarian)                                | NA                                                                                                                                                                                                                                                                                                                                                                          | Alpha       |



|                              |           |           |                                  |                                                                                                                                                                                     |                                                     |                                                                      |                                                                                                                                                            |                          |
|------------------------------|-----------|-----------|----------------------------------|-------------------------------------------------------------------------------------------------------------------------------------------------------------------------------------|-----------------------------------------------------|----------------------------------------------------------------------|------------------------------------------------------------------------------------------------------------------------------------------------------------|--------------------------|
|                              |           |           |                                  |                                                                                                                                                                                     |                                                     | residents aged 16 years or older)                                    |                                                                                                                                                            |                          |
| Jing Lian Suah               | 2022.3.22 | Malaysia  | Retrospective cohort study       | 18-39 years<br>Unvaccinated n=39,846<br>CoronaVac n=54,371<br>40-59 years<br>Unvaccinated n=14,998<br>CoronaVac n=36,675<br>≥60 years<br>Unvaccinated n=7,662<br>CoronaVac n=19,752 | Overall 55.0<br>Unvaccinated 60.7<br>CoronaVac 51.8 | General population (confirmed COVID-19 cases aged 18 years or older) | Unvaccinated n=19,315 (30.9)<br>CoronaVac n=12,533 (11.3)                                                                                                  | NA                       |
| Analfía Rearte               | 2022.3.26 | Argentina | Test-negative case-control study | 60-69 years<br>70-79 years<br>≥80 years                                                                                                                                             | NA                                                  | Elderly population (adults aged 60 years or older)                   | Hypertension, heart disease, diabetes, kidney disease, liver disease, immunodeficiencies, asthma, oncological disease.                                     | Alpha, Lambda, and Gamma |
| Leonardo Arregocés -Castillo | 2022.3.21 | Colombia  | Retrospective cohort study       | Median (IQR)<br>Unvaccinated 68.0 (63.0–75.0)<br>CoronaVac 72.0 (64.0–80.0)                                                                                                         | Overall 45.5<br>Unvaccinated 45.7<br>CoronaVac 45.1 | Elderly population (confirmed COVID-19 cases aged 60 years or older) | Hypertension, diabetes, chronic kidney disease, HIV, or cancer.<br>At least one comorbidity<br>Unvaccinated n=384,648 (27.2)<br>CoronaVac n=204,302 (29.9) | Mu (B.1.621)             |
| Thiago Cerqueira-Silva       | 2022.4.28 | Brazil    | Test-negative case-control study | 18–59 years<br>60–79 years<br>≥80 years                                                                                                                                             | NA                                                  | General population (adults aged 18 years or older)                   | Cardiac disease, diabetes mellitus, obesity, immunosuppression and chronic kidney disease.                                                                 | Gamma and Delta          |
| Yaowen Zhang                 | 2022.8.20 | Morocco   | Retrospective cohort study       | Unvaccinated 40.7 (15.1)<br>Fully vaccinated 37.9 (13.5)                                                                                                                            | Overall 57.2<br>Unvaccinated 56.7<br>CoronaVac 57.9 | General population (Morocco residents aged 18-99 years)              | NA                                                                                                                                                         | Alpha                    |

|                         |           |        |                                  |                                                                                                                                                                                                           |                                                                                                     |                                                    |                                                                                                                                                                  |            |
|-------------------------|-----------|--------|----------------------------------|-----------------------------------------------------------------------------------------------------------------------------------------------------------------------------------------------------------|-----------------------------------------------------------------------------------------------------|----------------------------------------------------|------------------------------------------------------------------------------------------------------------------------------------------------------------------|------------|
| Dan Wu                  | 2022.1.28 | China  | Retrospective cohort study       | 18-59 years<br>Unvaccinated n=408<br>BBIBP-CorV n=199<br>CoronaVac n=329<br>BBIBP-CorV+CoronaVac n=212<br>≥60 years<br>Unvaccinated n=65<br>BBIBP-CorV n=12<br>CoronaVac n=7<br>BBIBP-CorV+CoronaVac n=25 | Overall 46.4<br>Unvaccinated 49.0<br>BBIBP-CorV 46.0<br>CoronaVac 40.2<br>BBIBP-CorV+CoronaVac 51.5 | General population (adults aged 18 years or older) | Unvaccinated n=113<br>BBIBP-CorV n=20<br>CoronaVac n=27<br>BBIBP-CorV+CoronaVac n=24                                                                             | Delta (GS) |
| Alireza Mirahmad izadeh | 2022.5.9  | Iran   | Historical cohort study          | Median (IQR)<br>Unvaccinated 36 (29–48)<br>BBIBP-CorV NA<br>18-44 years<br>45-64 years<br>≥65 years                                                                                                       | Unvaccinated 45.3<br>BBIBP-CorV NA                                                                  | General population (adults aged 18 years or older) | underlying medical condition (ie, pregnancy, diabetes mellitus, malignancy, hypertension, cardiovascular disease, chronic kidney disease, and pulmonary disease) | NA         |
| Alexandre R Marra       | 2022.3.30 | Brazil | Retrospective cohort study       | Median (IQR)<br>Unvaccinated 32 (26–38)<br>CoronaVac 36 (30–42)                                                                                                                                           | Overall 27.5<br>Unvaccinated 30.8<br>CoronaVac 26.8                                                 | Healthcare workers (aged ≥ 18 years)               | Hypertension, Diabetes mellitus, Obesity, Dyslipidemia, Asthma<br>Unvaccinated n=191(20.3)<br>CoronaVac n=1,181(24.9)                                            | Gamma      |
| Matt D T Hitchings      | 2021.9.1  | Brazil | Test-negative case-control study | 18-29 years<br>30-59 years<br>≥60 years                                                                                                                                                                   | NA                                                                                                  | Healthcare workers (aged ≥ 18 years)               | NA                                                                                                                                                               | Gamma      |

|                         |            |                      |                                  |                                                                                                                                                                                              |                                                              |                                                                      |                                                                                                                                                         |                        |
|-------------------------|------------|----------------------|----------------------------------|----------------------------------------------------------------------------------------------------------------------------------------------------------------------------------------------|--------------------------------------------------------------|----------------------------------------------------------------------|---------------------------------------------------------------------------------------------------------------------------------------------------------|------------------------|
| Nawal Al Kaabi          | 2022.6.9   | United Arab Emirates | Retrospective cohort study       | Median (IQR)<br>Overall 35 (28–43)<br>Unvaccinated 34 (28–43)<br>Vaccinated 35 (29–43)                                                                                                       | Overall 63.7<br>Unvaccinated 63.8<br>Vaccinated 63.5         | General population (UAE residents aged 18 years or older)            | Asthma, Chronic kidney disease, Diabetes, Heart disease, Hypertension, Immunodeficiencies, Neoplasms, Respiratory diseases, History of transplantation. | Alpha and Delta        |
| Pilar T V Florentino    | 2022.8.13  | Brazil               | Test-negative case-control study | 6–11 years                                                                                                                                                                                   | NA                                                           | Young people aged 6-11 years                                         | Cardiac disease, Diabetes mellitus, Obesity, Immunosuppression, and chronic kidney disease.                                                             | Omicron                |
| Rapeepong Suphanchaimat | 2022.7.5   | Thailand             | Test-negative case-control study | <18 years<br>18-59 years<br>>60 years                                                                                                                                                        | NA                                                           | General population (the whole Thai population)                       | NA                                                                                                                                                      | Delta                  |
| Jing Lian Suah          | 2021.11.24 | Malaysia             | Retrospective cohort study       | 18-20 years n=38,823<br>20-29 years n=279,812<br>30-39 years n=237,335<br>40-49 years n=146,808<br>50-59 years n=96,808<br>60-69 years n=58,138<br>70-79 years n=22,383<br>≥80 years n=8,440 | NA                                                           | General population (confirmed COVID-19 cases aged 18 years or older) | Unvaccinated n=165,511<br>Fully vaccinated n=16,618                                                                                                     | Beta and Delta         |
| Iftikhar Nadeem         | 2022.5.4   | Pakistan             | Test-negative case-control study | 60 years and above                                                                                                                                                                           | Overall 67.4<br>Not vaccinated 64.9<br>Fully vaccinated 69.0 | Elderly population (adults aged 60 years or older).                  | Ischaemic heart disease n=309<br>Hypertension n=1,068<br>Diabetes n=735<br>Chronic liver disease n=125                                                  | Beta, Gamma, and Delta |

|                         |           |          |                              |                                                                                                                                                                                                                                                                                                                                                                |                                                     |                                                    |                                                                                                                                                                                                                |                                            |
|-------------------------|-----------|----------|------------------------------|----------------------------------------------------------------------------------------------------------------------------------------------------------------------------------------------------------------------------------------------------------------------------------------------------------------------------------------------------------------|-----------------------------------------------------|----------------------------------------------------|----------------------------------------------------------------------------------------------------------------------------------------------------------------------------------------------------------------|--------------------------------------------|
| Angel Paternina-Caicedo | 2022.7.1  | Colombia | Retrospective cohort study   | 40-49 years<br>Unvaccinated n=197,166<br>Two-dose CoronaVac n=1,503<br>50-59 years<br>Unvaccinated n=166,090<br>Two-dose CoronaVac n=13,422<br>60-69 years<br>Unvaccinated n=73,470<br>Two-dose CoronaVac n=19,011<br>70-79 years<br>Unvaccinated n=41,849<br>Two-dose CoronaVac n=22,788<br>80+ years<br>Unvaccinated n=60,435<br>Two-dose CoronaVac n=20,005 | Overall 49.3<br>Unvaccinated 49.5<br>CoronaVac 47.9 | General population (adults aged 40 years or older) | Diabetes, human immunodeficiency virus (HIV), cancer, hypertension, tuberculosis, neurological diseases, and chronic renal diseases.                                                                           | Alpha, Gamma, Delta, Lambda, and Mu (>50%) |
| Vladimir Petrović       | 2022.3.30 | Serbia   | Observational (cohort) study | ≥60 years                                                                                                                                                                                                                                                                                                                                                      | NA                                                  | Elderly population (adults aged 60 years or older) | NA                                                                                                                                                                                                             | Alpha                                      |
| Alejandro Jara          | 2022.7.28 | Chile    | Cohort study                 | 3 years<br>Unvaccinated n=76,259<br>CoronaVac n=52,024<br>4 years<br>Unvaccinated n=60,282<br>CoronaVac n=64,628<br>5 years<br>Unvaccinated n=52,982                                                                                                                                                                                                           | Overall 50.8<br>Unvaccinated 52.2<br>CoronaVac 49.5 | Young people aged 3-5 years                        | Chronic kidney disease, diabetes mellitus types 1 and 2, cancer, congenital heart disease, HIV, epilepsy, hemophilia, asthma, cystic fibrosis, juvenile idiopathic arthritis and systemic lupus erythematosus. | Omicron B.1.1.529                          |

|                          |           |           |                                  |                                                                                       |                                                      |                                                           |                                                                                                                                                                                                                                                                                   |                               |
|--------------------------|-----------|-----------|----------------------------------|---------------------------------------------------------------------------------------|------------------------------------------------------|-----------------------------------------------------------|-----------------------------------------------------------------------------------------------------------------------------------------------------------------------------------------------------------------------------------------------------------------------------------|-------------------------------|
|                          |           |           |                                  | CoronaVac n=77,775                                                                    |                                                      |                                                           |                                                                                                                                                                                                                                                                                   |                               |
| Betul Copur              | 2022.9.28 | Turkey    | Retrospective cohort study       | Median (IQR)<br>Overall 31 (26–40)<br>CoronaVac 31 (27-41)<br>Unvaccinated 31 (26-40) | 38.6                                                 | Healthcare workers                                        | Overall n=505 (26.4)<br>Diabetes mellitus n=190 (9.9)<br>Hypertension n=308 (16.1)<br>Congestive heart disease n=9 (0.5)<br>Chronic obstructive pulmonary disease n=21 (1.1)<br>Chronic hepatitis B n=53 (2.8)                                                                    | Alpha variant-dominant period |
| Maria Edith Solis-Castro | 2022.8.26 | Peru      | Retrospective cohort study       | Vaccinated 42.66 (12.98)<br>Unvaccinated 39.75 (11.89)                                | Overall 34.4<br>Vaccinated 35.2<br>Unvaccinated 31.1 | Healthcare workers (aged ≥18 years)                       | NA                                                                                                                                                                                                                                                                                | Lambda and Gamma              |
| Soledad González         | 2022.7.16 | Argentina | Retrospective cohort study       | Overall 7.6 (2.4)<br>Unvaccinated 6.5 (2.6)<br>Vaccinated 7.7 (2.4)                   | Overall 50.6<br>Unvaccinated 53.1<br>Vaccinated 50.4 | Young people aged 3-11 years                              | Overall n=73,162 (10.6)<br>Unvaccinated n=5,026 (8.6)<br>Vaccinated n=68,136 (10.8)                                                                                                                                                                                               | Omicron                       |
| Otávio T Ranzani         | 2022.10.6 | Brazil    | Test-negative case-control study | 18-39 years<br>40-59 years<br>60-79 years<br>≥80 years                                | NA                                                   | General population (adults aged 18 years or older)        | Cardiovascular, renal, diabetes, chronic respiratory disorder, obesity, or immunosuppression.                                                                                                                                                                                     | Delta and Omicron             |
| Zoltán Vokó              | 2022.7.22 | Hungary   | Observational study              | 18-64 years*                                                                          | NA                                                   | General population (Hungarian residents aged 18-64 years) | Cardiovascular diseases (myocardial infarction, angina, chronic heart failure, peripheral vascular disease, and stroke), diabetes mellitus (type 1 and type 2), immunosuppression (immunosuppressive therapy and transplantation), chronic pulmonary diseases (asthma and chronic | Delta                         |

|                     |           |       |                    |                  |    |                                                    |                                                                                                           |              |
|---------------------|-----------|-------|--------------------|------------------|----|----------------------------------------------------|-----------------------------------------------------------------------------------------------------------|--------------|
|                     |           |       |                    |                  |    |                                                    | obstructive pulmonary diseases), neoplasms, and chronic kidney diseases.                                  |              |
| Vincent Ka Chun Yan | 2022.10.9 | China | Case-control study | $\geq 65$ years* | NA | Elderly population (adults aged 65 years or older) | Cancer, chronic kidney disease, respiratory disease, diabetes mellitus, cardiovascular disease, dementia. | Omicron BA.2 |

Study ID consisted of the first author's surname and year of publication. Abbreviations: VE, vaccine effectiveness; NA, not available. \* Only the age subgroups with higher vaccine effectiveness in the study were extracted.

**Supplement table 2B. Characteristics of included studies in this systematic review and meta-analysis.**

| Study ID       | Sample size                                                                   | Vaccine name   | Vaccine brand | Immunization regimens                    | Dose interval             | Study period, duration and date | Follow-up period                                          | Primary outcomes                                                                                                                        | Diagnostic methods                       | Outcome Measures              |
|----------------|-------------------------------------------------------------------------------|----------------|---------------|------------------------------------------|---------------------------|---------------------------------|-----------------------------------------------------------|-----------------------------------------------------------------------------------------------------------------------------------------|------------------------------------------|-------------------------------|
| Al Kaabi, 2021 | Total n=38,206<br>WIV04 n=12,743<br>HB02 n=12,726<br>Placebo n=12,737         | WIV04,<br>HB02 | Sinopharm     | Two doses of WIV04,<br>Two doses of HB02 | 21 days                   | 2020.7.16<br>-<br>2020.12.20    | Median 77 days<br>(range 1-121)                           | 1. COVID-19 infection<br>(Symptomatic infection)                                                                                        | RT-PCR                                   | 1-<br>incidence<br>rate ratio |
| Jara, 2021     | Total n=9,645,302<br>Vaccinated<br>n=4,173,574<br>Unvaccinated<br>n=5,471,728 | CoronaVac      | Sinovac       | Two doses of CoronaVac                   | 28 days                   | 2021.2.2-<br>2021.5.1           | by the end of the<br>follow-up period<br>(May 1, 2021)    | 1. COVID-19 infection<br>(Asymptomatic infection<br>and symptomatic<br>infection)<br>2. Hospitalization<br>3. ICU admission<br>4. Death | RT-PCR<br>assay or<br>antigen<br>testing | 1-hazard<br>ratio             |
| Tanriver, 2021 | Total n=10029<br>Vaccine n=6559<br>Placebo n=3470                             | CoronaVac      | Sinovac       | Two doses of CoronaVac                   | 14 days                   | 2020.9.15<br>-<br>2021.3.16     | Median days, 43<br>(IQR 36–48)                            | 1. COVID-19 infection<br>(Symptomatic infection)<br>2. Hospitalization                                                                  | RT-PCR                                   | 1-<br>incidence<br>rate ratio |
| Ranzani, 2021  | Total n=31,950<br>Cases n=18,612<br>Controls n=13,338                         | CoronaVac      | Sinovac       | Two doses of CoronaVac                   | Cases<br>mean 30<br>days, | 2021.1.17<br>-<br>2021.4.29     | by the end of the<br>follow-up period<br>(April 29, 2021) | 1. COVID-19 infection<br>(Symptomatic infection)<br>2. Hospitalization<br>3. Death                                                      | RT-PCR                                   | 1-odds<br>ratio               |

|                         |                                                                                           |                                    |                                                 |                                                                                                 | Controls<br>mean 25<br>days  |                       |                                                                                   |                                                                                                                            |                              |                       |
|-------------------------|-------------------------------------------------------------------------------------------|------------------------------------|-------------------------------------------------|-------------------------------------------------------------------------------------------------|------------------------------|-----------------------|-----------------------------------------------------------------------------------|----------------------------------------------------------------------------------------------------------------------------|------------------------------|-----------------------|
| AlHosani, 2022          | Total n=154,872<br>Unvaccinated<br>n=91,941<br>Fully vaccinated<br>n=62,931               | BBIBP-CorV                         | Sinopharm                                       | Two doses of BBIBP-CorV                                                                         | NA                           | 2020.9.1-2021.5.1     | by the end of the follow-up period (May 1, 2021)                                  | 1. Hospitalization<br>2. ICU admission<br>3. Death                                                                         | RT-PCR                       | 1-odds ratio          |
| Kang, 2022              | Total n=7,291<br>Unvaccinated<br>n=5,888<br>Fully vaccinated<br>n=1,403                   | HB02,<br>CoronaVac                 | Sinovac,<br>Sinopharm                           | Two doses of HB02 or CoronaVac                                                                  | 21 days                      | 2021.5.21 - 2021.6.23 | 1 month (May and June 2021)                                                       | 1. COVID-19 infection (Asymptomatic infection and symptomatic infection)<br>2. Severe COVID-19 (Severe and critical cases) | RT-PCR                       | 1-adjusted risk ratio |
| Cerqueira-Silva_1, 2022 | Total n=2,321,159<br>Cases n=1,346,119<br>Controls n=975,040                              | CoronaVac,<br>BNT162b2             | Sinovac,<br>Pfizer-BioNTech                     | Two doses of CoronaVac,<br>Two doses of CoronaVac+BNT161b2                                      | NA,<br>booster at 4-6 months | 2022.1.1-2022.4.17    | Second dose (14-180, >180) and a booster dose (14-30, 31-60, 61-90, 91-120, >120) | 1. COVID-19 infection (Symptomatic infection)<br>2. Severe COVID-19 (Hospitalization or death)                             | RT-PCR or Lateral-flow tests | 1-odds ratio          |
| Jara_1, 2022            | Total n=5,199,534<br>Unvaccinated<br>n=1,071,988<br>Three doses of CoronaVac<br>n=186,946 | CoronaVac,<br>AZD1222,<br>BNT162b2 | Sinovac,<br>Oxford-AstraZeneca, Pfizer-BioNTech | Three doses of CoronaVac,<br>Two doses of CoronaVac+BNT162b2,<br>Two doses of CoronaVac+AZD1222 | booster at 5-6 months        | 2021.2.2-2021.11.10   | within 3 months after the booster doses                                           | 1. COVID-19 infection (Asymptomatic infection and symptomatic infection)<br>2. Hospitalization<br>3. ICU admission         | RT-PCR and antigen test      | 1-hazard ratio        |



|                    |                                                                                                         |                                                  |                                                         |                                                                                                     |                              |                        |                                                                                                 |                                                                                                 |        |                        |
|--------------------|---------------------------------------------------------------------------------------------------------|--------------------------------------------------|---------------------------------------------------------|-----------------------------------------------------------------------------------------------------|------------------------------|------------------------|-------------------------------------------------------------------------------------------------|-------------------------------------------------------------------------------------------------|--------|------------------------|
|                    | Two doses of CoronaVac+BNT162b2 n=2,019,260<br>Two doses of CoronaVac+AZD1222 n=1,921,340               |                                                  |                                                         |                                                                                                     |                              |                        |                                                                                                 | 4. Death                                                                                        |        |                        |
| Ma, 2022           | Total n=397<br>Unvaccinated n=66<br>CoronaVac n=170<br>BBIBP-CorV n=92<br>CoronaVac and BBIBP-CorV n=69 | CoronaVac, BBIBP-CorV                            | Sinovac, Sinopharm                                      | Two doses of CoronaVac,<br>Two doses of BBIBP-CorV,<br>One dose of BBIBP-CorV+one dose of CoronaVac | NA                           | 2021.7.4-2021.9.3      | Fully vaccinated median days, 63 (IQR 46-94);<br>Unvaccinated: from July 4 to September 3, 2021 | 1. COVID-19 infection (Symptomatic infection)<br>2. Severe COVID-19 (Severe and critical cases) | RT-PCR | 1-relative risk        |
| Can, 2022          | Total n=3,174<br>Fully vaccinated n=2,267<br>Unvaccinated n=907                                         | CoronaVac                                        | Sinovac                                                 | Two doses of CoronaVac                                                                              | NA                           | 2021.3.1-2021.5.31     | Median 90 days                                                                                  | 1. COVID-19 Infection (Symptomatic infection)                                                   | PCR    | 1-incidence rate ratio |
| Sritips ukho, 2022 | Total n=1,312<br>Cases n=179<br>Controls n=1,133                                                        | CoronaVac, BNT162b2, ChAdOx1 nCoV-19, BBIBP-CorV | Sinovac, Sinopharm, Oxford-AstraZeneca, Pfizer-BioNTech | Two doses of CoronaVac,<br>Two doses of CoronaVac+BNT162b2,<br>Two doses of CoronaVac+ChAdOx1       | 4 weeks, booster at 12 weeks | 2021.7.25 - 2021.10.23 | Median days, 81 (IQR 60-91), 21 (IQR 14-41), 45 (IQR 23-55)                                     | 1. COVID-19 infection (Asymptomatic infection and symptomatic infection)                        | RT-PCR | 1-odds ratio           |

|                                         |                                                                            |                        |                                 |                                                                  |                                       |                                  |                                                                                                               |                                                                                               |                                         |                                |
|-----------------------------------------|----------------------------------------------------------------------------|------------------------|---------------------------------|------------------------------------------------------------------|---------------------------------------|----------------------------------|---------------------------------------------------------------------------------------------------------------|-----------------------------------------------------------------------------------------------|-----------------------------------------|--------------------------------|
| Vokó,<br>2021                           | Total n=8,670,107<br>HB02 n=895,465<br>Unvaccinated<br>n=7,774,642         | HB02                   | Sinopharm                       | Two doses of HB02                                                | NA                                    | 2021.1.22<br>-<br>2021.6.10      | by the end of the<br>follow-up period<br>(June 10, 2021)                                                      | 1. COVID-19 infection<br>(Asymptomatic infection<br>and symptomatic<br>infection)<br>2. Death | PCR or<br>antigen<br>rapid tests        | 1-risk<br>ratio                |
| Suah,<br>2022                           | Total n=173,304<br>Unvaccinated<br>n=62,506<br>CoronaVac<br>n=110,798      | CoronaVac              | Sinovac<br>Biotech              | Two doses of CoronaVac                                           | NA                                    | 2021.9.1-<br>2021.9.30           | after 1-2 months<br>and 3-5 months                                                                            | 1. ICU admission<br>2. Death                                                                  | RT-PCR<br>and rapid<br>antigen<br>tests | 1-adjusted<br>relative<br>risk |
| Rearte,<br>2022                         | Total n=201,022<br>Cases n=78,221<br>Controls n=122,801                    | BBIBP-CorV             | Sinopharm                       | Two doses of BBIBP-<br>CorV                                      | 28 days                               | 2021.1.31<br>-<br>2021.9.14      | by the end of the<br>follow-up period<br>(September 14,<br>2021)                                              | 1. COVID-19 infection<br>(Asymptomatic infection<br>and symptomatic<br>infection)<br>2. Death | RT-PCR                                  | 1-relative<br>risk             |
| Arrego<br>cés-<br>Castill<br>o,<br>2022 | Total n=2,097,431<br>Unvaccinated<br>n=1,414,147<br>CoronaVac<br>n=683,284 | CoronaVac              | Sinovac                         | Two doses of CoronaVac                                           | NA                                    | 2021.3.11<br>-<br>2021.10.2<br>6 | Fully vaccinated<br>median days,<br>118 (IQR 89–<br>156);<br>Unvaccinated<br>median days, 117<br>(IQR 87–156) | 1. Hospitalization<br>2. Death                                                                | NA                                      | 1-hazard<br>ratio              |
| Cerque<br>ira-<br>Silva_                | Total n=6,443,048<br>Cases n=2,984,348<br>Controls n=3,458,700             | CoronaVac,<br>BNT162b2 | Sinovac,<br>Pfizer-<br>BioNTech | Two doses of<br>CoronaVac,<br>Two doses of<br>CoronaVac+BNT162b2 | 28 days,<br>booster<br>at 6<br>months | 2021.1.18<br>-<br>2021.11.1<br>1 | Second dose 14-<br>180 days, >180<br>days;                                                                    | 1. COVID-19 infection<br>(Asymptomatic infection<br>and symptomatic<br>infection)             | RT-PCR<br>or rapid<br>antigen test      | 1-odds<br>ratio                |

|                         |                                                                                                          |                          |                       |                                                                                                     |            |                       |                                                       |                                                                                                            |        |                 |
|-------------------------|----------------------------------------------------------------------------------------------------------|--------------------------|-----------------------|-----------------------------------------------------------------------------------------------------|------------|-----------------------|-------------------------------------------------------|------------------------------------------------------------------------------------------------------------|--------|-----------------|
| 2,<br>2022              |                                                                                                          |                          |                       |                                                                                                     |            |                       | Booster dose 14-30 days, >30 days                     | 2. Hospitalization<br>3. Death<br>4. Severe COVID-19 (hospitalization or death)                            |        |                 |
| Zhang,<br>2022          | Total n=347,041<br>Unvaccinated n=206,149<br>Fully vaccinated n=140,892                                  | BBIBP-CorV               | Sinopharm             | Two doses of BBIBP-CorV                                                                             | 21-28 days | 2021.2.1-2021.6.30    | by the end of the follow-up period (June 30, 2021)    | 1. Hospitalization                                                                                         | RT-PCR | 1-odds ratio    |
| Wu,<br>2022             | Total n=1,257<br>Unvaccinated n=473<br>BBIBP-CorV n=211<br>CoronaVac n=336<br>BBIBP-CorV+CoronaVac n=237 | BBIBP-CorV,<br>CoronaVac | Sinopharm,<br>Sinovac | Two doses of CoronaVac,<br>Two doses of BBIBP-CorV,<br>One dose of BBIBP-CorV+one dose of CoronaVac | NA         | 2021.7.31 - 2021.8.24 | within 6 months after the second doses                | 1. COVID-19 infection (Symptomatic infection)<br>2. Severe COVID-19 (Severe and critical illness)          | PCR    | 1-relative risk |
| Mirahmadizadeh,<br>2022 | Total n=1,664,611<br>Unvaccinated n=1,000,510<br>BBIBP-CorV n=664,101                                    | BBIBP-CorV               | Sinopharm             | Two doses of BBIBP-CorV                                                                             | 28 days    | 2021.2.9-2021.10.22   | by the end of the follow-up period (October 22, 2021) | 1. COVID-19 infection (Asymptomatic infection and symptomatic infection)<br>2. Hospitalization<br>3. Death | RT-PCR | 1-relative risk |
| Marra,<br>2022          | Total n=7,897<br>Unvaccinated n=1,512<br>CoronaVac n=6,385                                               | CoronaVac                | Sinovac               | Two doses of CoronaVac                                                                              | 21 days    | 2021.1.1-2021.8.3     | by the end of the follow-up period (August 3, 2021)   | 1. COVID-19 infection (Symptomatic infection)                                                              | RT-PCR | 1-rate ratio    |

|                     |                                                                         |                                      |                                              |                                                                    |          |                             |                                                                                               |                                                                                                                                                        |                                       |                |
|---------------------|-------------------------------------------------------------------------|--------------------------------------|----------------------------------------------|--------------------------------------------------------------------|----------|-----------------------------|-----------------------------------------------------------------------------------------------|--------------------------------------------------------------------------------------------------------------------------------------------------------|---------------------------------------|----------------|
| Hitchings, 2021     | Total n=543<br>Cases n=261<br>Controls n=282                            | CoronaVac                            | Sinovac                                      | Two doses of CoronaVac                                             | NA       | 2021.1.19<br>-<br>2021.4.13 | by the end of the follow-up period (April 13, 2021)                                           | 1. COVID-19 infection (Symptomatic infection)                                                                                                          | RT-PCR or antigen detection           | 1-odds ratio   |
| Al Kaabi, 2022      | Total n=2,199,772<br>Unvaccinated n=1,099,886<br>Vaccinated n=1,099,886 | BBIBP-CorV                           | Sinopharm                                    | Two doses of BBIBP-CorV                                            | NA       | 2021.7.1-<br>2021.9.30      | by the end of the follow-up period (September 30, 2021)                                       | 1. Hospitalization<br>2. ICU admission<br>3. Death                                                                                                     | RT-PCR                                | 1-hazard ratio |
| Florentino, 2022    | Total n=147,485<br>Cases n=72,651<br>Controls n=74,834                  | CoronaVac                            | Sinovac                                      | Two doses of CoronaVac                                             | ≥14 days | 2022.1.21<br>-<br>2022.4.15 | by the end of the follow-up period (April 15, 2022)                                           | 1. COVID-19 infection (Symptomatic infection)<br>2. Hospitalization                                                                                    | RT-PCR and antigen tests              | 1-odds ratio   |
| Suphanchaimat, 2022 | Total n=657,010<br>Cases n=221,658<br>Controls n=435,352                | CoronaVac, ChAdOx1 nCoV-19, BNT162b2 | Sinovac, Oxford-AstraZeneca, Pfizer-BioNTech | Two doses of CoronaVac+ChAdOx1,<br>Two doses of CoronaVac+BNT162b2 | NA       | 2021.9.1-<br>2021.12.31     | Time since the last vaccination date: 15–29 days, 30–59 days, 60–89 days, and 90 days onward. | 1.COVID-19 infection (Asymptomatic infection and symptomatic infection)<br>2. Severe COVID-19 (Hypoxemic pneumonia or an intubated patient or a death) | PCR and rapid antigen diagnostic test | 1-odds ratio   |
| Suah, 2021          | Total n=888,547<br>Unvaccinated n=749,524<br>Fully vaccinated n=139,023 | CoronaVac                            | Sinovac                                      | Two doses of CoronaVac                                             | 21 days  | 2021.4.1-<br>2021.9.15      | by the end of the follow-up period (September 15, 2021)                                       | 1. ICU admission<br>2. Death                                                                                                                           | RT-PCR or rapid molecular             | 1-odds ratio   |

|                         |                                                                           |            |           |                         |         |                          |                                                                            |                                                                                                                      |                                         |                 |
|-------------------------|---------------------------------------------------------------------------|------------|-----------|-------------------------|---------|--------------------------|----------------------------------------------------------------------------|----------------------------------------------------------------------------------------------------------------------|-----------------------------------------|-----------------|
| Nadeem, 2022            | Total n=3,426<br>Not vaccinated<br>n=1,360<br>Fully vaccinated<br>n=2,066 | BBIBP-CorV | Sinopharm | Two doses of BBIBP-CorV | NA      | 2021.5.5-<br>2021.7.31   | by the end of the follow-up period (July 31, 2021)                         | 1. COVID-19 infection (Symptomatic infection)<br>2. Hospitalization<br>3. Death                                      | PCR                                     | 1-odds ratio    |
| Paternina-Caicedo, 2022 | Total n=615,739<br>Unvaccinated<br>n=539,010<br>CoronaVac n=76,729        | CoronaVac  | Sinovac   | Two doses of CoronaVac  | 28 days | 2021.3.1-<br>2021.8.15   | by the end of the follow-up period (August 15, 2021)                       | 1. Hospitalization<br>2. ICU admission<br>3. Death                                                                   | PCR, antigen, or IgM positive test      | 1-hazard ratio  |
| Petrovic, 2022          | Total n=359,080<br>Unvaccinated<br>n=241,166<br>BBIBP-CorV<br>n=117,914   | BBIBP-CorV | Sinopharm | Two doses of BBIBP-CorV | 21 days | 2020.12.24-<br>2021.4.28 | started 14 days from application of the second dose and lasted four weeks. | 1. COVID-19 infection (Symptomatic infection)<br>2. Severe COVID-19 (Confirmed pneumonia and oxygenation was needed) | RT-PCR or antigen rapid diagnostic test | 1-risk ratio    |
| Jara_2, 2022            | Total n=383,950<br>Unvaccinated<br>n=189,523<br>CoronaVac<br>n=194,427    | CoronaVac  | Sinovac   | Two doses of CoronaVac  | 28 days | 2021.12.6-<br>2022.2.26  | by the end of the follow-up period (February 26, 2022)                     | 1. COVID-19 infection (Symptomatic infection)<br>2. Hospitalization<br>3. ICU admission                              | RT-PCR assay or antigen tests           | 1-hazard ratio  |
| Copur, 2022             | Total n=1,911<br>Vaccinated n=1,160<br>Unvaccinated n=751                 | CoronaVac  | Sinovac   | Two doses of CoronaVac  | NA      | 2021.2.25-<br>2021.5.20  | Median 93 days (vaccinated 90 days; unvaccinated 95 days).                 | 1. COVID-19 infection (Asymptomatic infection and symptomatic infection)                                             | RT-PCR                                  | 1-hazard ratios |

|                          |                                                                                           |                                      |                                              |                                                                                                                                          |                               |                        |                                                                                                          |                                                                                                            |                              |                          |
|--------------------------|-------------------------------------------------------------------------------------------|--------------------------------------|----------------------------------------------|------------------------------------------------------------------------------------------------------------------------------------------|-------------------------------|------------------------|----------------------------------------------------------------------------------------------------------|------------------------------------------------------------------------------------------------------------|------------------------------|--------------------------|
| Edith Solis-Castro, 2022 | Total n=520,733<br>Vaccinated n=415,212<br>Unvaccinated n 105,521                         | BBIBP-CorV                           | Sinopharm                                    | Two doses of BBIBP-CorV                                                                                                                  | 21 days                       | 2021.2.9-2021.6.26     | by the end of the follow-up period (June 26, 2021)                                                       | 1. COVID-19 infection (Asymptomatic infection and symptomatic infection)<br>2. Hospitalization<br>3. Death | PCR or antigen test          | 1-incident density ratio |
| González, 2022           | Total n=689,552<br>Vaccinated n=630,908<br>Unvaccinated n=58,644                          | BBIBP-CorV                           | Sinopharm                                    | Two doses of BBIBP-CorV                                                                                                                  | 21 days or 28 days            | 2021.12.1-2022.3.9     | by the end of the follow-up period (March 9, 2022)                                                       | 1. Hospitalization                                                                                         | RT-PCR                       | 1-odds ratios            |
| Ranza ni, 2022           | Total n=1,845,695<br>Cases n=975,604<br>Controls n=870,091                                | CoronaVac                            | Sinovac                                      | Two doses of CoronaVac                                                                                                                   | NA                            | 2021.9.6-2022.4.22     | by the end of the follow-up period (April 22, 2022)                                                      | 1. COVID-19 infection (Symptomatic infection)<br>2. Severe COVID-19 (Hospitalization or death)             | RT-PCR or rapid antigen test | 1-adjusted odds ratio    |
| Vokó, 2022               | Cases (18-64 years) *<br>Total n=196,704<br>Unvaccinated n=162,864<br>Vaccinated n=33,840 | HB02, BNT162b2, mRNA-1273, Ad26.COVS | Sinopharm, Pfizer-BioNTech, Moderna, Janssen | Two doses of HB02,<br>Three doses of HB02,<br>Two doses of HB02+BNT162b2,<br>Two doses of HB02+mRNA-1273,<br>Two doses of HB02+Ad26.COVS | NA, booster at least 4 months | 2021.9.13 - 2021.12.31 | Two doses of HB02: 14-120, 121-180, 181-240, or more than 240 days;<br>booster vaccinations: 14-120 days | 1. COVID-19 infection (Asymptomatic infection and symptomatic infection)<br>2. Hospitalization<br>3. Death | PCR or antigen test          | 1- incidence rate ratio  |

|              |                                                                     |                        |                                 |                                                                                                  |                                           |                        |                                                          |                                                                                |     |                          |
|--------------|---------------------------------------------------------------------|------------------------|---------------------------------|--------------------------------------------------------------------------------------------------|-------------------------------------------|------------------------|----------------------------------------------------------|--------------------------------------------------------------------------------|-----|--------------------------|
| Yan,<br>2022 | ≥65 years*<br>Total n=59,965<br>Cases n=6,314,<br>Controls n=53,651 | CoronaVac,<br>BNT162b2 | Sinovac,<br>Pfizer-<br>BioNTech | Two doses of<br>CoronaVac,<br>Three doses of<br>CoronaVac,<br>Two doses of<br>CoronaVac+BNT162b2 | NA,<br>booster<br>at least<br>6<br>months | 2022.1.1-<br>2022.3.31 | by the end of the<br>follow-up period<br>(31 March 2022) | 1. Severe COVID-19<br>(Admission to ICU or<br>ventilatory support)<br>2. Death | PCR | 1-adjusted<br>odds ratio |
|--------------|---------------------------------------------------------------------|------------------------|---------------------------------|--------------------------------------------------------------------------------------------------|-------------------------------------------|------------------------|----------------------------------------------------------|--------------------------------------------------------------------------------|-----|--------------------------|

Study ID consisted of the first author's surname and year of publication. Abbreviations: VE, vaccine effectiveness; NA, not available. \* Data were extracted only for the age subgroup in the study with high vaccine effectiveness.

**Supplement table 3. Interpretation of primary clinical outcomes.**

| Clinical outcomes                                    | Interpretation                                                                                                                                                                                                                                                                                                                                                      |
|------------------------------------------------------|---------------------------------------------------------------------------------------------------------------------------------------------------------------------------------------------------------------------------------------------------------------------------------------------------------------------------------------------------------------------|
| COVID-19 infection                                   | Laboratory-confirmed COVID-19 infection through polymerase chain reaction or antigen test;                                                                                                                                                                                                                                                                          |
| COVID-19 related hospitalization                     | Any inpatient hospital admission with a positive, laboratory confirmed COVID-19;                                                                                                                                                                                                                                                                                    |
| COVID-19 related intensive care unit (ICU) admission | Any inpatient admission to intensive care unit with a positive, laboratory confirmed COVID-19;                                                                                                                                                                                                                                                                      |
| COVID-19 related death                               | Occurrence of any death with a positive, laboratory confirmed COVID-19;                                                                                                                                                                                                                                                                                             |
| Severe COVID-19 outcomes                             | Severe cases were those in which the patient had a respiratory rate above 30 breaths/min, resting blood oxygen saturation of 93% or lower, or Pao <sub>2</sub> -Fio <sub>2</sub> ratio of 300 mm Hg or lower; critical cases had at least one of the following: the need for oxygen supplementation, admission to intensive care, mechanical ventilation, or death. |



**Supplement table 4. Risk of bias for included randomized control trails.**

| Study ID        | Random Sequence Generation | Allocation Concealment | Blinding of participants and personnel | Blinding of outcome assessment | Incomplete outcome data | Selective Reporting | Other bias | <b>Overall bias</b> |
|-----------------|----------------------------|------------------------|----------------------------------------|--------------------------------|-------------------------|---------------------|------------|---------------------|
| Al Kaabi, 2021  | Low                        | Low                    | Low                                    | Low                            | Low                     | Low                 | Low        | <b>Low</b>          |
| Tanriover, 2021 | Low                        | Low                    | Low                                    | Low                            | Low                     | Low                 | Low        | <b>Low</b>          |

Study ID consisted of the first author's surname and year of publication; different immunization regimens in the same study were named by adding letters after the year (a,b,c,d,e, etc.); different studies by the same author in the same year of publication were named by adding Arabic numerals after the surname (1,2,3,4,5, etc.).

**Supplement table 5. Risk of bias for included cohort studies.**

| Study ID                 | Selection |        |        |        | Comparability |        | Exposure |        | Total scores | Quality         |
|--------------------------|-----------|--------|--------|--------|---------------|--------|----------|--------|--------------|-----------------|
|                          | Item 1    | Item 2 | Item 3 | Item 4 | Item 5        | Item 6 | Item 7   | Item 8 |              |                 |
| Jara, 2021               | 1         | 1      | 1      | 1      | 2             | 1      | 1        | 1      | 9            | <b>Good</b>     |
| AlHosani, 2022           | 1         | 1      | 1      | 1      | 1             | 1      | 1        | 1      | 8            | <b>Good</b>     |
| Kang, 2022               | 0         | 1      | 1      | 1      | 2             | 1      | 1        | 1      | 8            | <b>Good</b>     |
| Jara_1, 2022             | 1         | 1      | 1      | 1      | 2             | 1      | 1        | 1      | 9            | <b>Good</b>     |
| Ma, 2022                 | 0         | 1      | 1      | 1      | 1             | 1      | 1        | 1      | 7            | <b>Good</b>     |
| Can, 2022                | 0         | 1      | 1      | 1      | 1             | 1      | 1        | 1      | 7            | <b>Good</b>     |
| Suah, 2022               | 1         | 1      | 1      | 1      | 2             | 1      | 1        | 1      | 9            | <b>Good</b>     |
| Arregocés-Castillo, 2022 | 0         | 1      | 1      | 1      | 2             | 1      | 1        | 1      | 8            | <b>Good</b>     |
| Zhang, 2022              | 1         | 1      | 1      | 1      | 2             | 1      | 1        | 1      | 9            | <b>Good</b>     |
| Wu, 2022                 | 0         | 1      | 1      | 1      | 1             | 1      | 1        | 1      | 7            | <b>Good</b>     |
| Mirahmadizadeh, 2022     | 1         | 1      | 1      | 1      | 2             | 1      | 1        | 1      | 9            | <b>Good</b>     |
| Marra, 2022              | 0         | 1      | 1      | 1      | 2             | 1      | 1        | 1      | 8            | <b>Good</b>     |
| Al Kaabi, 2022           | 1         | 1      | 1      | 1      | 2             | 1      | 1        | 1      | 9            | <b>Good</b>     |
| Suah, 2021               | 1         | 1      | 1      | 1      | 2             | 1      | 1        | 1      | 9            | <b>Good</b>     |
| Paternina-Caicedo, 2022  | 1         | 1      | 1      | 1      | 2             | 1      | 1        | 1      | 9            | <b>Good</b>     |
| Jara_2, 2022             | 0         | 1      | 1      | 1      | 2             | 1      | 1        | 1      | 8            | <b>Good</b>     |
| Copur, 2022              | 0         | 1      | 0      | 1      | 2             | 1      | 1        | 1      | 7            | <b>Good</b>     |
| Vokó, 2021               | 1         | 1      | 1      | 1      | 2             | 1      | 1        | 1      | 9            | <b>Good</b>     |
| Petrovic, 2022           | 0         | 1      | 1      | 1      | 0             | 1      | 1        | 1      | 6            | <b>Moderate</b> |
| Edith Solis-Castro, 2022 | 0         | 1      | 1      | 0      | 2             | 1      | 1        | 1      | 7            | <b>Good</b>     |
| González, 2022           | 0         | 1      | 1      | 0      | 2             | 1      | 1        | 1      | 7            | <b>Good</b>     |
| Vokó, 2022               | 1         | 1      | 1      | 1      | 1             | 1      | 1        | 1      | 8            | <b>Good</b>     |

Study ID consisted of the first author's surname and year of publication; different immunization regimens in the same study were named by adding letters after the year (a,b,c,d,e, etc.); different studies by the same author in the same year of publication were named by adding Arabic numerals after the surname (1,2,3,4,5, etc.).

Item 1: Representativeness of the exposed cohort.

Item 2: Selection of the non-exposed cohort.

Item 3: Ascertainment of exposure.

Item 4: Demonstration that outcome of interest was not present at start of study.

Item 5: Comparability of cohorts on the basis of the design or analysis.

Item 6: Assessment of outcome.

Item 7: Was follow up long enough for outcomes to occur.

Item 8: Adequacy of follow up of cohorts.

**Supplement table 6. Risk of bias for included case-control studies.**

| Study ID                | Selection |        |        | Comparability |        | Exposure |        |        | Total score | Quality         |
|-------------------------|-----------|--------|--------|---------------|--------|----------|--------|--------|-------------|-----------------|
|                         | Item 1    | Item 2 | Item 3 | Item 4        | Item 5 | Item 6   | Item 7 | Item 7 |             |                 |
| Ranzani, 2021           | 1         | 0      | 1      | 1             | 2      | 1        | 1      | 1      | 8           | <b>Good</b>     |
| Cerqueira-Silva_1, 2022 | 1         | 1      | 1      | 0             | 2      | 1        | 1      | 1      | 8           | <b>Good</b>     |
| Sritipsukho, 2022       | 1         | 1      | 1      | 1             | 2      | 1        | 1      | 1      | 9           | <b>Good</b>     |
| Rearte, 2022            | 1         | 0      | 1      | 1             | 2      | 1        | 1      | 1      | 8           | <b>Good</b>     |
| Cerqueira-Silva_2, 2022 | 1         | 1      | 1      | 1             | 2      | 1        | 1      | 1      | 9           | <b>Good</b>     |
| Hitchings, 2021         | 1         | 0      | 1      | 0             | 2      | 1        | 1      | 1      | 7           | <b>Good</b>     |
| Florentino, 2022        | 1         | 0      | 1      | 1             | 2      | 1        | 1      | 1      | 8           | <b>Good</b>     |
| Suphanchaimat, 2022     | 1         | 1      | 1      | 1             | 1      | 1        | 1      | 1      | 8           | <b>Good</b>     |
| Nadeem, 2022            | 1         | 0      | 1      | 1             | 0      | 1        | 1      | 1      | 6           | <b>Moderate</b> |
| Ranzani, 2022           | 1         | 1      | 1      | 0             | 2      | 1        | 1      | 1      | 8           | <b>Good</b>     |
| Yan, 2022               | 1         | 1      | 1      | 1             | 1      | 1        | 1      | 1      | 8           | <b>Good</b>     |

Study ID consisted of the first author's surname and year of publication; different immunization regimens in the same study were named by adding letters after the year (a,b,c,d,e, etc.); different studies by the same author in the same year of publication were named by adding Arabic numerals after the surname (1,2,3,4,5, etc.).

Item 1: Is the case definition adequate?

Item 2: Representativeness of the cases.

Item 3: Selection of controls.

Item 4: Definition of controls.

Item 5: Comparability of cases and controls on the basis of the design or analysis.

Item 6: Ascertainment of exposure.

Item 7: Same method of ascertainment for cases and controls.

Item 8: Non-Response Rate.

**Supplement table 7. Vaccine effectiveness of immunization regimens included in the study.**

| Study ID                 | Population | Age (years)            | Immunization regimens             | COVID-19 infection | Hospitalization     | ICU admission     | Death             | Severe outcomes     |
|--------------------------|------------|------------------------|-----------------------------------|--------------------|---------------------|-------------------|-------------------|---------------------|
| Al Kaabi, 2021a          | GP         | ≥18                    | 2 WIV04                           | 72.8 (58.1, 82.4)  | None                | None              | None              | None                |
| Al Kaabi, 2021b          | GP         | ≥18                    | 2 HB02                            | 78.1 (64.8, 86.3)  | None                | None              | None              | None                |
| Jara, 2021               | GP         | ≥16                    | 2 CoronaVac                       | 65.9 (65.2, 66.6)  | 87.5 (86.7, 88.2)   | 90.3 (89.1, 91.4) | 86.3 (84.5, 87.9) | None                |
| Tanriover, 2021          | GP         | 18-59                  | 2 CoronaVac                       | 83.5 (65.4, 92.1)  | 100.0 (20.4, 100.0) | None              | None              | None                |
| Ranzani, 2021            | EP         | ≥70                    | 2 CoronaVac                       | 46.8 (38.7, 53.8)  | 55.5 (46.5, 62.9)   | None              | 61.2 (48.9, 70.5) | None                |
| AlHosani, 2022           | GP         | ≥15                    | 2 BBIBP-CorV                      | None               | 79.8 (78.0, 81.4)   | 92.2 (89.7, 94.1) | 97.1 (83.0, 99.9) | None                |
| Kang, 2022               | CCs        | ≥18                    | 2 HB02 or CoronaVac               | 51.8 (20.3, 83.2)  | None                | None              | None              | 100.0 (98.4, 100.0) |
| Cerqueira-Silva_1, 2022a | GP         | ≥18                    | 2 CoronaVac                       | 3.2 (2.1, 4.2)     | None                | None              | 67.8 (64.0, 71.3) | 64.5 (62.6, 66.3)   |
| Cerqueira-Silva_1, 2022b | GP         | ≥18                    | 2 CoronaVac+BNT161b2              | 63.6 (62.8, 64.3)  | None                | None              | 90.6 (89.8, 91.3) | 89.4 (87.8, 90.7)   |
| Jara_1, 2022a            | GP         | ≥16                    | 3 CoronaVac                       | 78.8 (76.8, 80.6)  | 86.3 (83.7, 88.5)   | 92.2 (88.7, 94.6) | 86.7 (80.5, 91.0) | None                |
| Jara_1, 2022b            | GP         | ≥16                    | 2 CoronaVac+BNT162b2              | 96.5 (96.2, 96.7)  | 96.1 (95.3, 96.9)   | 96.2 (94.6, 97.3) | 96.8 (93.9, 98.3) | None                |
| Jara_1, 2022c            | GP         | ≥16                    | 2 CoronaVac+AZD1222               | 93.2 (92.9, 93.6)  | 97.7 (97.3, 98.0)   | 98.9 (98.5, 99.2) | 98.1 (97.3, 98.6) | None                |
| Ma, 2022                 | GP         | ≥18                    | Combined BBIBP-CorV and CoronaVac | 74.6 (36.0, 90.0)  | None                | None              | None              | 100.0 (47.6, 100.0) |
| Can, 2022                | HCWs       | <30, 30-39, 40-49, ≥50 | 2 CoronaVac                       | 39.0 (19.6, 53.7)  | None                | None              | None              | None                |
| Sritipsukho, 2022a       | GP         | ≥18                    | 2 CoronaVac                       | 60.0 (49.0, 69.0)  | None                | None              | None              | None                |
| Sritipsukho, 2022b       | GP         | ≥18                    | 2 CoronaVac+BNT162b2              | 98.0 (87.0, 100.0) | None                | None              | None              | None                |
| Sritipsukho, 2022c       | GP         | ≥18                    | 2 CoronaVac+ChAdOx1               | 86.0 (74.0, 93.0)  | None                | None              | None              | None                |
| Vokó, 2021               | GP         | ≥16                    | 2 HB02                            | 72.8 (71.2, 74.4)  | None                | None              | 86.0 (83.7, 87.9) | None                |

|                          |          |              |                                   |                      |                   |                    |                   |                   |
|--------------------------|----------|--------------|-----------------------------------|----------------------|-------------------|--------------------|-------------------|-------------------|
| Suah, 2022               | GP       | ≥18          | 2 CoronaVac                       | 74.5 (70.6, 78.0)    | None              | 56.0 (51.2, 60.2)  | 79.2 (76.8, 81.4) | None              |
| Rearte, 2022             | EP       | ≥60          | 2 BBIBP-CorV                      | 44.0 (42.0, 45.0)    | None              | None               | 85.0 (84.0, 86.0) | None              |
| Arregocés-Castillo, 2022 | EP       | ≥60          | 2 CoronaVac                       | None                 | 47.3 (41.9, 52.3) | None               | 72.1 (70.1, 73.9) | None              |
| Cerqueira-Silva_2, 2022a | GP       | ≥18          | 2 CoronaVac                       | 55.0 (54.3, 55.7)    | 82.1 (81.4, 82.8) | None               | 82.7 (81.7, 83.6) | 82.6 (82.1, 83.2) |
| Cerqueira-Silva_2, 2022b | GP       | ≥18          | 2 CoronaVac+BNT162b2              | 92.7 (91.0, 94.0)    | 97.2 (96.0, 98.0) | None               | 98.3 (96.3, 99.2) | 97.3 (96.1, 98.1) |
| Zhang, 2022              | GP       | ≥18          | 2 BBIBP-CorV                      | None                 | 88.5 (85.8, 90.7) | None               | None              | None              |
| Wu, 2022                 | CCs      | ≥18          | Combined BBIBP-CorV and CoronaVac | 50.5 (27.6, 66.2)    | None              | None               | None              | 82.4 (21.0, 96.1) |
| Mirahmadizadeh, 2022     | GP       | ≥18          | 2 BBIBP-CorV                      | 79.9 (79.4, 80.4)    | 71.9 (70.7, 73.1) | None               | 86.1 (84.1, 88.0) | None              |
| Marra, 2022              | HCWs     | ≥18          | 2 CoronaVac                       | 51.3 (34.6, 63.7)    | None              | None               | None              | None              |
| Hitchings, 2021          | HCWs     | ≥18          | 2 CoronaVac                       | 37.1 (-53.3, 74.2)   | None              | None               | None              | None              |
| Al Kaabi, 2022           | GP       | ≥18          | 2 BBIBP-CorV                      | None                 | 79.6 (77.7, 81.3) | 86.0 (82.2, 89.0)  | 84.1 (70.8, 91.3) | None              |
| Florentino, 2022         | Children | 6-11         | 2 CoronaVac                       | 40.3 (34.2, 45.9)    | 59.2 (11.3, 84.5) | None               | None              | None              |
| Suphanchaimat, 2022a     | GP       | <18, 59, >60 | 18-<br>2 CoronaVac+BNT162b2       | 95.0 (93.8, 95.9)    | None              | None               | None              | 98.9 (92.1, 99.8) |
| Suphanchaimat, 2022b     | GP       | <18, 59, >60 | 18-<br>2 CoronaVac+ChAdOx1        | 89.2 (88.0, 90.3)    | None              | None               | None              | 99.1 (93.6, 99.9) |
| Suah, 2021               | GP       | >18          | 2 CoronaVac                       | None                 | None              | 72.0 (69.9, 73.9)  | 82.4 (81.0, 83.7) | None              |
| Nadeem, 2022             | EP       | ≥60          | 2 BBIBP-CorV                      | 94.3 (92.2, 95.9)    | 60.5 (7.9, 82.9)  | None               | 98.6 (94.2, 99.6) | None              |
| Paternina-Caicedo, 2022  | GP       | ≥40          | 2 CoronaVac                       | -44.0 (-54.1, -34.6) | 3.3 (-15.1, 18.7) | 18.0 (-10.6, 39.2) | 21.4 (-0.7, 38.6) | None              |
| Petrovic, 2022           | EP       | ≥60          | 2 BBIBP-CorV                      | 86.9 (86.0, 87.7)    | None              | None               | None              | 90.5 (88.9, 91.9) |

|                          |          |                         |                      |                   |                   |                   |                   |                   |
|--------------------------|----------|-------------------------|----------------------|-------------------|-------------------|-------------------|-------------------|-------------------|
| Jara_2, 2022             | Children | 3-5                     | 2 CoronaVac          | 38.2 (36.5, 39.9) | 64.6 (49.6, 75.2) | 69.0 (18.6, 88.2) | None              | None              |
| Copur, 2022              | HCWs     | 31 (26-40) <sup>a</sup> | 2 CoronaVac          | 65.0 (50.0, 75.0) | None              | None              | None              | None              |
| Edith Solis-Castro, 2022 | HCWs     | ≥18                     | 2 BBIBP-CorV         | 26.3 (23.8, 28.6) | 67.7 (60.1, 73.8) | None              | 90.9 (85.5, 94.2) | None              |
| González, 2022           | Children | 3-11                    | 2 BBIBP-CorV         | None              | 76.4 (62.9, 84.5) | None              | None              | None              |
| Ranzani, 2022a           | GP       | ≥18                     | 2 CoronaVac          | 51.3 (49.9, 52.7) | None              | None              | None              | 86.5 (83.4, 88.9) |
| Ranzani, 2022b           | GP       | ≥18                     | 2 CoronaVac          | 28.1 (26.5, 29.6) | None              | None              | None              | 56.1 (40.6, 67.5) |
| Vokó, 2022a              | GP       | 18-64                   | 2 HB02               | 10.9 (6.7, 15.0)  | 53.8 (43.9, 61.9) | None              | 67.4 (39.2, 82.5) | None              |
| Vokó, 2022b              | GP       | 18-64                   | 3 HB02               | 60.6 (53.4, 66.7) | 77.5 (58.2, 87.9) | None              | 91.1 (36.4, 98.7) | None              |
| Vokó, 2022c              | GP       | 18-64                   | 2 HB02+BNT162b2      | 88.0 (87.2, 88.7) | 94.6 (93.3, 95.6) | None              | 95.9 (93.4, 97.5) | None              |
| Vokó, 2022d              | GP       | 18-64                   | 2 HB02+mRNA-1273     | 91.0 (88.2, 93.1) | 94.8 (87.6, 97.9) | None              | None              | None              |
| Vokó, 2022e              | GP       | 18-64                   | 2 HB02+Ad26.COVS     | 78.1 (74.7, 81.0) | 95.3 (88.7, 98.0) | None              | 95.8 (70.0, 99.4) | None              |
| Yan, 2022a               | EP       | ≥65                     | 2 CoronaVac          | None              | None              | None              | 74.8 (72.5, 76.9) | 58.9 (50.3, 66.1) |
| Yan, 2022b               | EP       | ≥65                     | 3 CoronaVac          | None              | None              | None              | 95.5 (93.7, 96.8) | 88.0 (80.8, 92.5) |
| Yan, 2022c               | EP       | ≥65                     | 2 CoronaVac+BNT162b2 | None              | None              | None              | 97.2 (93.7, 98.7) | 95.2 (80.5, 98.8) |

Study ID consisted of the first author's surname and year of publication; different immunization regimens in the same study were named by adding letters after the year (a,b,c,d,e, etc.); different studies by the same author in the same year of publication were named by adding Arabic numerals after the surname (1,2,3,4,5, etc.).

Abbreviations: VE, vaccine effectiveness; HCWs, healthcare workers; GP, general population; EP, elderly people; CCs, Cases and close contacts; CI, confidence interval. Data are VE% and its 95% CI.

<sup>a</sup> Median age (interquartile range).

None: Data not reported or not applicable.

**Supplement figure 1. Vaccine effectiveness against COVID-19 infection.**

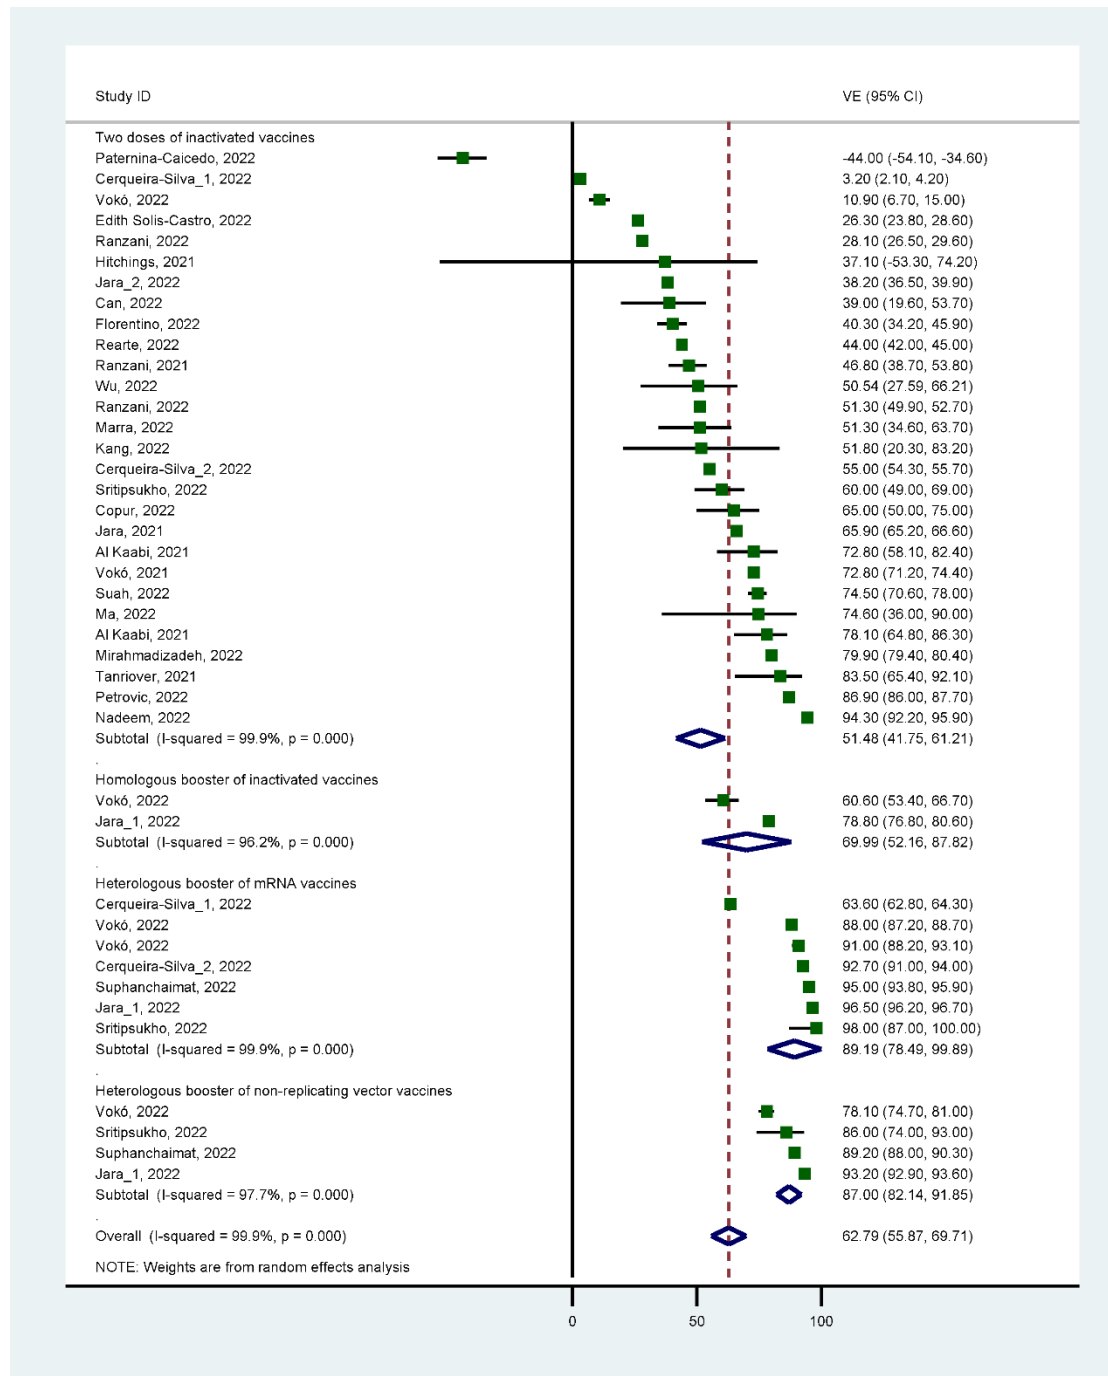

Study ID consisted of the first author's surname and year of publication; different immunization regimens in the same study were named by adding letters after the year (a,b,c,d,e, etc.); different studies by the same author in the same year of publication were named by adding Arabic numerals after the surname (1,2,3,4,5, etc.).

Abbreviations: VE, vaccine effectiveness; CI, confidence interval.



**Supplement figure 2. Vaccine effectiveness against COVID-19 related hospitalization.**

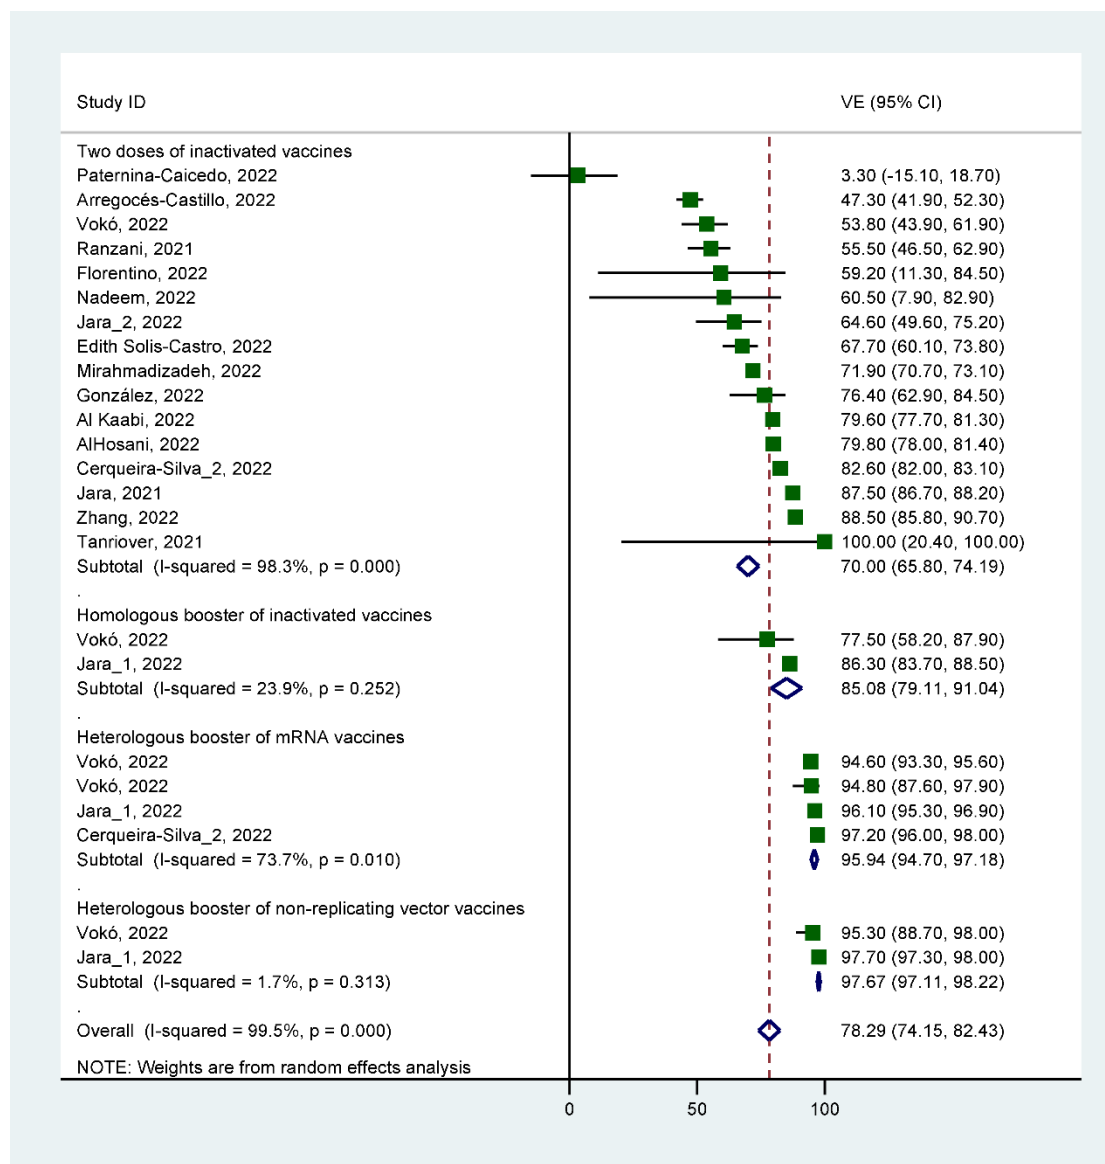

Study ID consisted of the first author's surname and year of publication; different immunization regimens in the same study were named by adding letters after the year (a,b,c,d,e, etc.); different studies by the same author in the same year of publication were named by adding Arabic numerals after the surname (1,2,3,4,5, etc.).

Abbreviations: VE, vaccine effectiveness; CI, confidence interval.

**Supplement figure 3. Vaccine effectiveness against COVID-19 related ICU admission.**

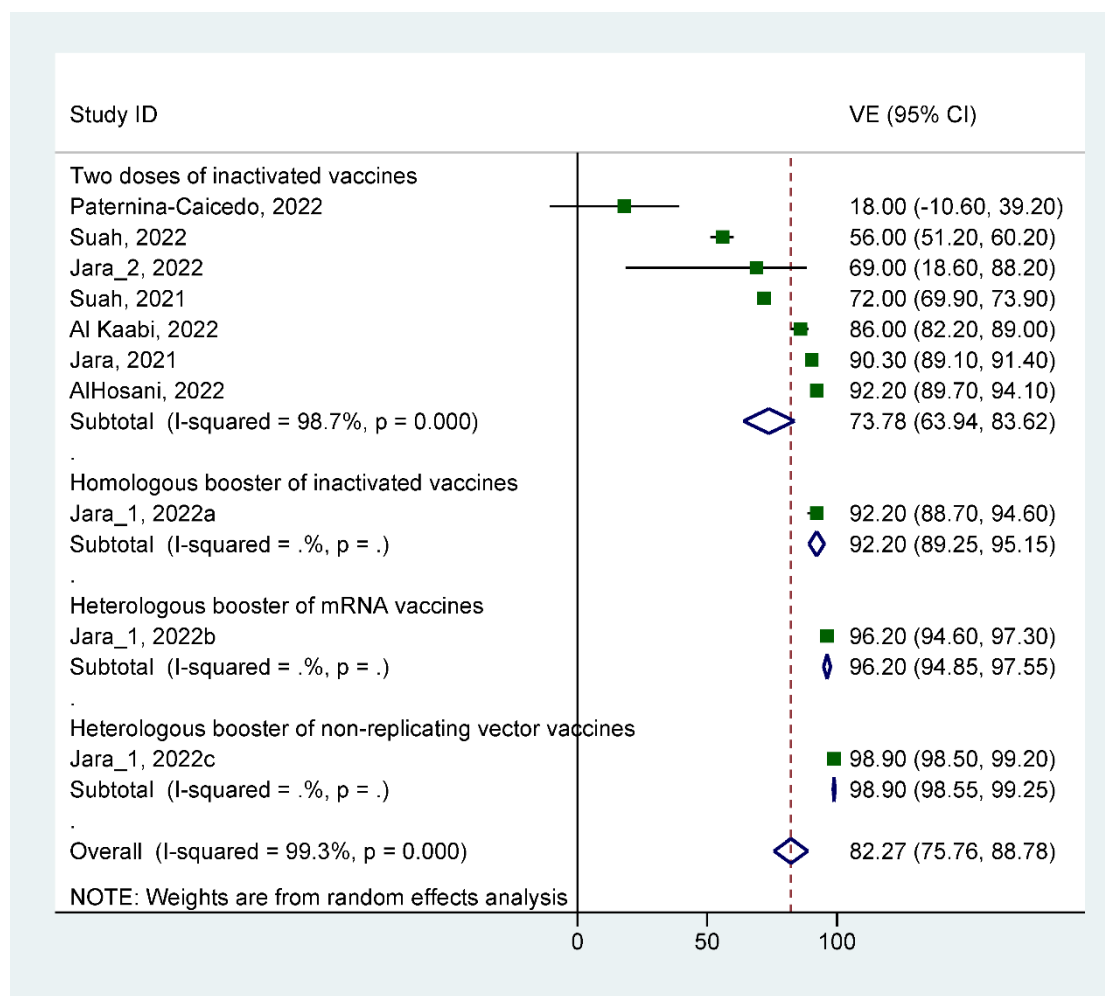

Study ID consisted of the first author's surname and year of publication; different immunization regimens in the same study were named by adding letters after the year (a,b,c,d,e, etc.); different studies by the same author in the same year of publication were named by adding Arabic numerals after the surname (1,2,3,4,5, etc.).

Abbreviations: VE, vaccine effectiveness; CI, confidence interval.

**Supplement figure 4. Vaccine effectiveness against COVID-19 related death.**

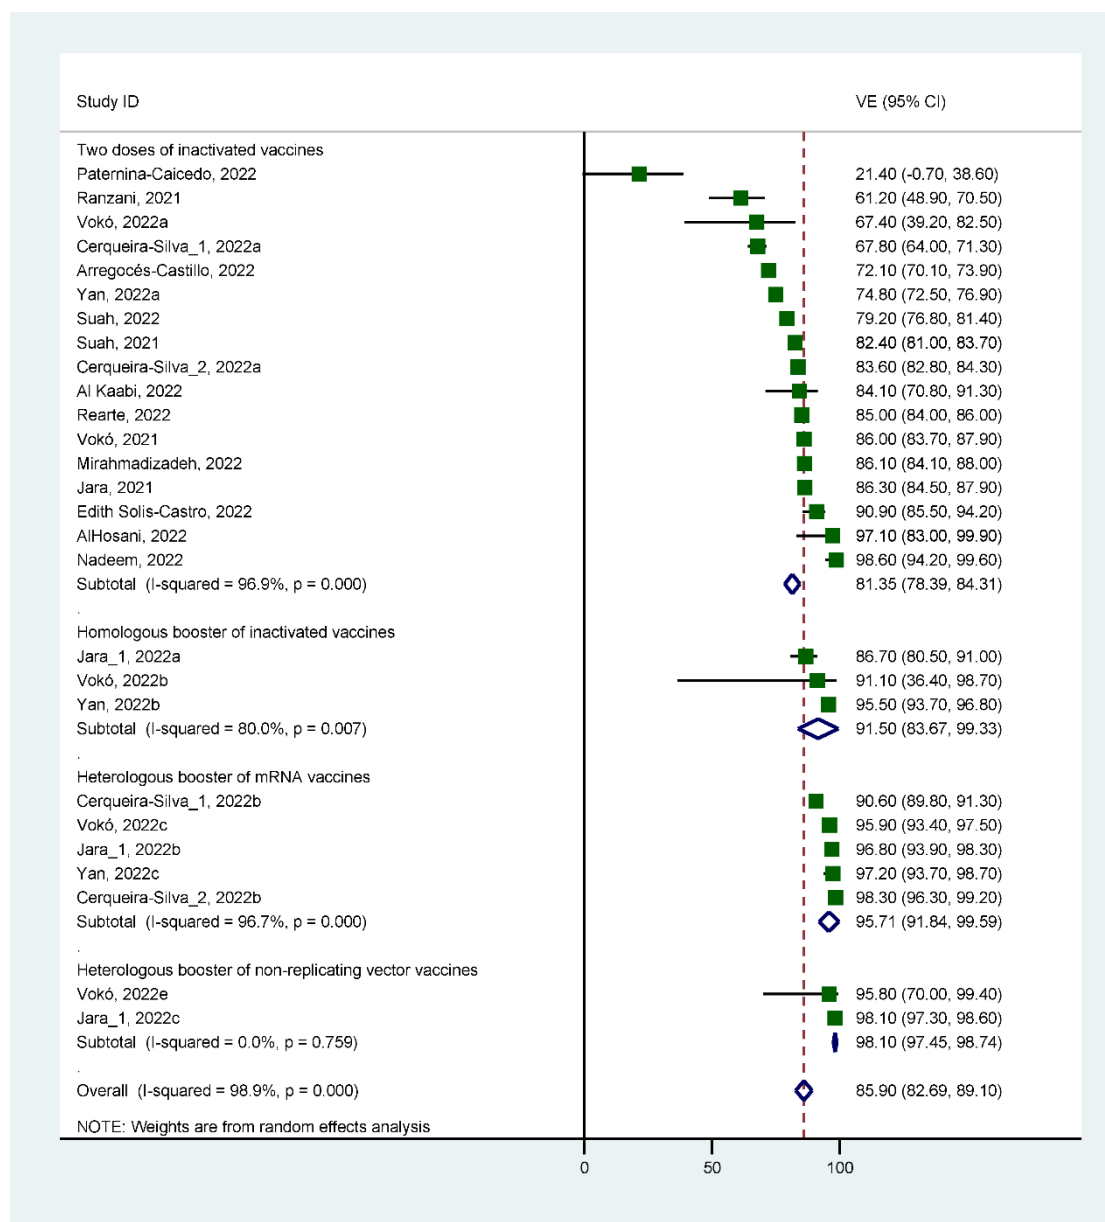

Study ID consisted of the first author's surname and year of publication; different immunization regimens in the same study were named by adding letters after the year (a,b,c,d,e, etc.); different studies by the same author in the same year of publication were named by adding Arabic numerals after the surname (1,2,3,4,5, etc.).

Abbreviations: VE, vaccine effectiveness; CI, confidence interval.

**Supplement figure 5. Vaccine effectiveness against severe COVID-19 outcomes.**

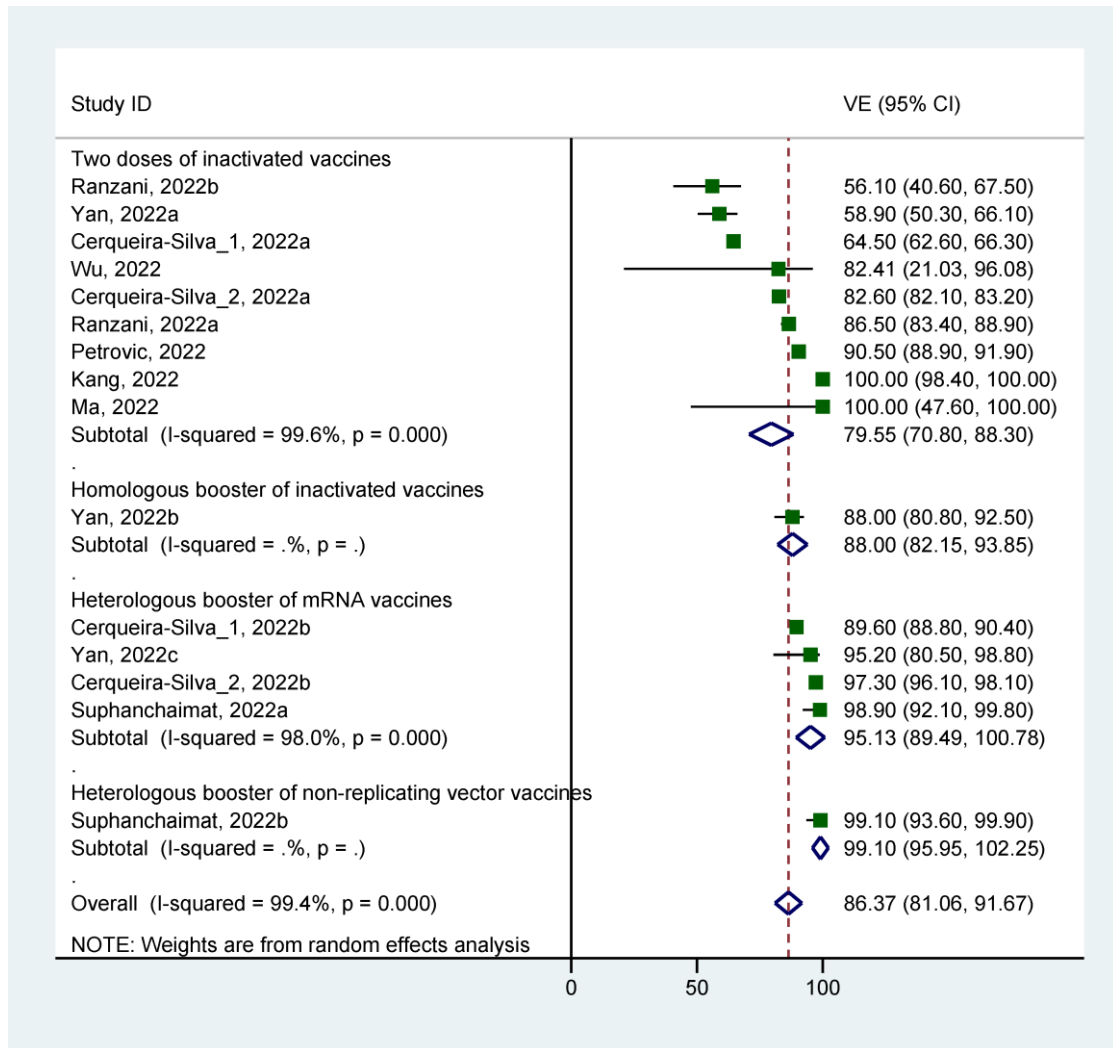

Study ID consisted of the first author's surname and year of publication; different immunization regimens in the same study were named by adding letters after the year (a,b,c,d,e, etc.); different studies by the same author in the same year of publication were named by adding Arabic numerals after the surname (1,2,3,4,5, etc.).

Abbreviations: VE, vaccine effectiveness; CI, confidence interval.

**Supplement table 8. Subgroup analysis of follow-up times.**

| <b>Outcomes</b>                                         | <b>Study (n)</b> | <b>VE% (95% CI)</b>   | <b>I<sup>2</sup> (%)</b> | <b>p value</b> |
|---------------------------------------------------------|------------------|-----------------------|--------------------------|----------------|
| <b>Within 6 months</b>                                  |                  |                       |                          |                |
| <b>COVID-19 infection</b>                               |                  |                       |                          |                |
| <b>Overall</b>                                          | 26               | 62.57 (55.02, 70.12)  | 99.9                     | <0.001         |
| Two doses of inactivated vaccines                       | 24               | 50.32 (39.81, 60.84)  | 99.9                     | <0.001         |
| Homologous booster of inactivated vaccines              | 2                | 69.99 (52.16, 87.82)  | 96.2                     | <0.001         |
| Heterologous booster of mRNA vaccines                   | 6                | 89.19 (78.49, 99.89)  | 99.9                     | <0.001         |
| Heterologous booster of non-replicating vector vaccines | 4                | 87.00 (82.14, 91.85)  | 97.7                     | <0.001         |
| <b>COVID-19 related hospitalization</b>                 |                  |                       |                          |                |
| <b>Overall</b>                                          | 15               | 79.05 (75.10,82.99)   | 99.4                     | <0.001         |
| Two doses of inactivated vaccines                       | 14               | 69.03 (64.64, 73.42)  | 97.6                     | <0.001         |
| Homologous booster of inactivated vaccines              | 2                | 85.08 (79.11,91.04)   | 23.9                     | 0.252          |
| Heterologous booster of mRNA vaccines                   | 3                | 95.94 (94.70,97.18)   | 73.7                     | 0.010          |
| Heterologous booster of non-replicating vector vaccines | 2                | 97.67 (97.11, 98.22)  | 1.7                      | 0.313          |
| <b>COVID-19 related ICU admission</b>                   |                  |                       |                          |                |
| <b>Overall</b>                                          | 7                | 80.75 (73.54,87.97)   | 99.4                     | <0.001         |
| Two doses of inactivated vaccines                       | 6                | 69.15 (56.89,81.41)   | 98.8                     | <0.001         |
| Homologous booster of inactivated vaccines              | 1                | 92.20(89.25,95.15)    | NA                       | NA             |
| Heterologous booster of mRNA vaccines                   | 1                | 96.20 (94.85,97.55)   | NA                       | NA             |
| Heterologous booster of non-replicating vector vaccines | 1                | 98.90(98.55,99.25)    | NA                       | NA             |
| <b>COVID-19 related death</b>                           |                  |                       |                          |                |
| <b>Overall</b>                                          | 16               | 85.38 (81.93,88.82)   | 98.9                     | <0.001         |
| Two doses of inactivated vaccines                       | 15               | 79.89 (76.55,83.24)   | 97.1                     | <0.001         |
| Homologous booster of inactivated vaccines              | 3                | 91.50 (83.67,99.33)   | 80.0                     | 0.007          |
| Heterologous booster of mRNA vaccines                   | 5                | 95.71 (91.84,99.59)   | 96.7                     | <0.001         |
| Heterologous booster of non-replicating vector vaccines | 2                | 98.10 (97.45,98.74)   | 0.0                      | 0.759          |
| <b>Severe COVID-19</b>                                  |                  |                       |                          |                |
| <b>Overall</b>                                          | 9                | 86.12 (80.25,91.98)   | 99.4                     | <0.001         |
| Two doses of inactivated vaccines                       | 8                | 79.48 (70.35,88.61)   | 99.6                     | <0.001         |
| Homologous booster of inactivated vaccines              | 1                | 88.00 (82.15,93.85)   | NA                       | NA             |
| Heterologous booster of mRNA vaccines                   | 4                | 95.13 (89.49, 100.78) | 98.0                     | <0.001         |
| Heterologous booster of non-replicating vector vaccines | 1                | 99.10 (95.95,102.25)  | NA                       | NA             |
| <b>Over 6 months</b>                                    |                  |                       |                          |                |
| <b>COVID-19 infection</b>                               |                  |                       |                          |                |
| Two doses of inactivated vaccines                       | 5                | 32.52 (-9.72, 74.75)  | 100.0                    | <0.001         |
| <b>COVID-19 related hospitalization</b>                 |                  |                       |                          |                |
| Two doses of inactivated vaccines                       | 4                | 68.22 (61.14, 75.30)  | 98.4                     | <0.001         |
| <b>COVID-19 related ICU admission</b>                   |                  |                       |                          |                |

|                                   |   |                      |      |        |
|-----------------------------------|---|----------------------|------|--------|
| Two doses of inactivated vaccines | 1 | 92.20 (90.00, 94.40) | NA   | NA     |
| <b>COVID-19 related death</b>     |   |                      |      |        |
| Two doses of inactivated vaccines | 5 | 76.37 (65.08, 87.66) | 98.6 | <0.001 |
| <b>Severe COVID-19</b>            |   |                      |      |        |
| Two doses of inactivated vaccines | 2 | 67.19 (56.61, 77.78) | 99.0 | <0.001 |

Abbreviations: VE, vaccine effectiveness; CI, confidence interval; NA, not applicable. p value for heterogeneity.

**Supplement table 9. Vaccine effectiveness of immunization regimens against SARS-CoV-2 variants.**

| Study ID        | Study design        | Country       | Population        | Immunization regimens | Outcomes           | VE% (95% CI)       | SARS-CoV-2 variants |
|-----------------|---------------------|---------------|-------------------|-----------------------|--------------------|--------------------|---------------------|
| Can, 2022       | Cohort              | Turkey        | HCWs              | 2 CoronaVac           | COVID-19 infection | 39.0 (19.6, 53.7)  | Alpha (75%)         |
| Vokó, 2021      | Cohort              | Hungary       | GP                | 2 HB02                | COVID-19 infection | 72.8 (71.2, 74.4)  | Alpha               |
|                 |                     |               | GP                | 2 HB02                | Death              | 86.0 (83.7, 87.9)  | Alpha               |
| Zhang, 2022     | Cohort              | Morocco       | GP                | 2 BBIBP-CorV          | Hospitalization    | 88.5 (85.8, 90.7)  | Alpha               |
| Petrovic, 2022  | Cohort              | Serbia        | EP                | 2 BBIBP-CorV          | COVID-19 infection | 86.9 (86.0, 87.7)  | Alpha               |
|                 |                     |               | EP                | 2 BBIBP-CorV          | Severe COVID-19    | 90.5 (88.9, 91.9)  | Alpha               |
| Copur, 2022     | Cohort              | Turkey        | HCWs              | 2 CoronaVac           | COVID-19 infection | 65.0 (50.0, 75.0)  | Alpha               |
| Ranzani, 2021   | Case-control        | Brazil        | EP                | 2 CoronaVac           | COVID-19 infection | 46.8 (38.7, 53.8)  | Gamma               |
|                 |                     |               | EP                | 2 CoronaVac           | Hospitalization    | 55.5 (46.5, 62.9)  | Gamma               |
|                 |                     |               | EP                | 2 CoronaVac           | Death              | 61.2 (48.9, 70.5)  | Gamma               |
| Marra, 2022     | Cohort              | Brazil        | HCWs              | 2 CoronaVac           | COVID-19 infection | 51.3 (34.6, 63.7)  | Gamma               |
| Hitchings, 2021 | Case-control        | Brazil        | HCWs              | 2 CoronaVac           | COVID-19 infection | 37.1 (-53.3, 74.2) | Gamma               |
| Jara_1, 2022    | Cohort              | Chile         | GP                | 2 CoronaVac           | COVID-19 infection | 78.8 (76.8, 80.6)  | Delta (63%)         |
|                 |                     |               | GP                | 2 CoronaVac           | Hospitalization    | 86.3 (83.7, 88.5)  | Delta (63%)         |
|                 |                     |               | GP                | 2 CoronaVac           | ICU admission      | 92.2 (88.7, 94.6)  | Delta (63%)         |
|                 |                     |               | GP                | 2 CoronaVac           | Death              | 86.7 (80.5, 91.0)  | Delta (63%)         |
|                 |                     |               | GP                | 2 CoronaVac+BNT162b2  | COVID-19 infection | 96.5 (96.2, 96.7)  | Delta (63%)         |
|                 |                     |               | GP                | 2 CoronaVac+BNT162b2  | Hospitalization    | 96.1 (95.3, 96.9)  | Delta (63%)         |
|                 |                     |               | GP                | 2 CoronaVac+BNT162b2  | ICU admission      | 96.2 (94.6, 97.3)  | Delta (63%)         |
|                 |                     |               | GP                | 2 CoronaVac+BNT162b2  | Death              | 96.8 (93.9, 98.3)  | Delta (63%)         |
|                 |                     |               | GP                | 2 CoronaVac+AZD1222   | COVID-19 infection | 93.2 (92.9, 93.6)  | Delta (63%)         |
|                 |                     |               | GP                | 2 CoronaVac+AZD1222   | Hospitalization    | 97.7 (97.3, 98.0)  | Delta (63%)         |
| GP              | 2 CoronaVac+AZD1222 | ICU admission | 98.9 (98.5, 99.2) | Delta (63%)           |                    |                    |                     |

|                     |              |          |     |                          |                    |                     |             |
|---------------------|--------------|----------|-----|--------------------------|--------------------|---------------------|-------------|
| Kang, 2022          | Cohort       | China    | GP  | 2 CoronaVac+AZD1222      | Death              | 98.1 (97.3, 98.6)   | Delta (63%) |
|                     |              |          | CCs | 2 CoronaVac              | COVID-19 infection | 51.8 (20.3, 83.2)   | Delta (GS)  |
|                     |              |          | CCs | 2 CoronaVac              | COVID-19 infection | 60.4 (31.8, 88.9)   | Delta (GS)  |
|                     |              |          | CCs | 2 CoronaVac              | Severe COVID-19    | 100.0 (98.4, 100.0) | Delta (GS)  |
| Ma, 2022            | Cohort       | China    | CCs | BBIBP-CorV and CoronaVac | COVID-19 infection | 74.6 (36.0, 90.0)   | Delta (GS)  |
|                     |              |          | CCs | BBIBP-CorV and CoronaVac | Severe COVID-19    | 100.0 (47.6, 100.0) | Delta (GS)  |
| Sritipsukho, 2022   | Case-control | Thailand | GP  | 2 CoronaVac              | COVID-19 infection | 60.0 (49.0, 69.0)   | Delta       |
|                     |              |          | GP  | 2 CoronaVac+BNT162b2     | COVID-19 infection | 98.0 (87, 100.0)    | Delta       |
|                     |              |          | GP  | 2 CoronaVac+ChAdOx1      | COVID-19 infection | 86.0 (74.0, 93.0)   | Delta       |
| Wu, 2022            | Cohort       | China    | GP  | BBIBP-CorV and CoronaVac | COVID-19 infection | 50.5 (27.6, 66.2)   | Delta (GS)  |
|                     |              |          | GP  | BBIBP-CorV and CoronaVac | Severe COVID-19    | 82.4 (21.0, 96.1)   | Delta (GS)  |
| Ranzani, 2022a      | Case-control | Brazil   | GP  | 2 CoronaVac              | COVID-19 infection | 51.3 (49.9, 52.7)   | Delta       |
|                     |              |          | GP  | 2 CoronaVac              | Severe COVID-19    | 86.5 (83.4, 88.9)   | Delta       |
| Suphanchaimat, 2022 | Case-control | Thailand | GP  | 2 CoronaVac+ChAdOx1      | COVID-19 infection | 87.1 (85.2, 88.8)   | Delta       |
|                     |              |          | GP  | 2 CoronaVac+ChAdOx1      | Severe COVID-19    | 99.1 (93.6, 99.9)   | Delta       |
|                     |              |          | GP  | 2 CoronaVac+BNT162b2     | COVID-19 infection | 95.0 (93.8, 95.9)   | Delta       |
|                     |              |          | GP  | 2 CoronaVac+BNT162b2     | Severe COVID-19    | 97.6 (90.3, 99.4)   | Delta       |
| Vokó, 2022          | Cohort       | Hungary  | GP  | 2 HB02                   | COVID-19 infection | 10.9 (6.7, 15.0)    | Delta       |
|                     |              |          | GP  | 2 HB02                   | Hospitalization    | 53.8 (43.9, 61.9)   | Delta       |
|                     |              |          | GP  | 2 HB02                   | Death              | 67.4 (39.2, 82.5)   | Delta       |
|                     |              |          | GP  | 2 HB02                   | COVID-19 infection | 60.6 (53.4, 66.7)   | Delta       |
|                     |              |          | GP  | 2 HB02                   | Hospitalization    | 77.5 (58.2, 87.9)   | Delta       |
|                     |              |          | GP  | 2 HB02                   | Death              | 91.1 (36.4, 98.7)   | Delta       |
|                     |              |          | GP  | 2 HB02+BNT162b2          | COVID-19 infection | 88.0 (87.2, 88.7)   | Delta       |



|                         |              |             |          |                      |                    |                   |                |
|-------------------------|--------------|-------------|----------|----------------------|--------------------|-------------------|----------------|
|                         |              |             | GP       | 2 HB02+BNT162b2      | Hospitalization    | 94.6 (93.3, 95.6) | Delta          |
|                         |              |             | GP       | 2 HB02+BNT162b2      | Death              | 95.9 (93.4, 97.5) | Delta          |
|                         |              |             | GP       | 2 HB02+mRNA-1273     | COVID-19 infection | 91.0 (88.2, 93.1) | Delta          |
|                         |              |             | GP       | 2 HB02+mRNA-1273     | Hospitalization    | 94.8 (87.6, 97.9) | Delta          |
|                         |              |             | GP       | 2 HB02+Ad26.COVS.S   | COVID-19 infection | 78.1 (74.7, 81.0) | Delta          |
|                         |              |             | GP       | 2 HB02+Ad26.COVS.S   | Hospitalization    | 95.3 (88.7, 98.0) | Delta          |
|                         |              |             | GP       | 2 HB02+Ad26.COVS.S   | Death              | 95.8 (70.0, 99.4) | Delta          |
| Florentino, 2022        | Case-control | Brazil      | Children | 2 CoronaVac          | COVID-19 infection | 39.8 (33.7, 45.4) | Omicron        |
|                         |              |             | Children | 2 CoronaVac          | Hospitalization    | 59.2 (11.3, 84.5) | Omicron        |
| Jara_2, 2022            | Cohort       | Chile       | Children | 2 CoronaVac          | COVID-19 infection | 38.2 (36.5, 39.9) | Omicron        |
|                         |              |             | Children | 2 CoronaVac          | Hospitalization    | 64.6 (49.6, 75.2) | Omicron        |
|                         |              |             | Children | 2 CoronaVac          | ICU admission      | 69.0 (18.6, 88.2) | Omicron        |
| González, 2022          | Cohort       | Argentina   | Children | 2 BBIBP-CorV         | Hospitalization    | 76.4 (62.9, 84.5) | Omicron        |
| Ranzani, 2022b          | Case-control | Brazil      | GP       | 2 CoronaVac          | COVID-19 infection | 28.1 (26.5, 29.6) | Omicron        |
|                         |              |             | GP       | 2 CoronaVac          | Severe COVID-19    | 56.1 (40.6, 67.5) | Omicron        |
| Cerqueira-Silva_1, 2022 | Case-control | Brazil      | GP       | 2 CoronaVac          | COVID-19 infection | 3.2 (2.1, 4.2)    | Omicron        |
|                         |              |             | GP       | 2 CoronaVac          | Death              | 67.8 (64.0, 71.3) | Omicron        |
|                         |              |             | GP       | 2 CoronaVac          | Severe COVID-19    | 64.5 (62.6, 66.3) | Omicron        |
|                         |              |             | GP       | 2 CoronaVac+BNT161b2 | COVID-19 infection | 63.6 (62.8, 64.3) | Omicron        |
|                         |              |             | GP       | 2 CoronaVac+BNT161b2 | Death              | 90.6 (89.8, 91.3) | Omicron        |
|                         |              |             | GP       | 2 CoronaVac+BNT161b2 | Severe COVID-19    | 89.6 (88.8, 90.4) | Omicron        |
| Yan, 2022               | Case-control | China       | EP       | 2 CoronaVac          | Severe COVID-19    | 74.8 (72.5, 76.9) | Omicron        |
|                         |              |             | EP       | 2 CoronaVac          | Death              | 58.9 (50.3, 66.1) | Omicron        |
|                         |              |             | EP       | 3 CoronaVac          | Severe COVID-19    | 95.5 (93.7, 96.8) | Omicron        |
|                         |              |             | EP       | 3 CoronaVac          | Death              | 88.0 (80.8, 92.5) | Omicron        |
|                         |              |             | EP       | 2 CoronaVac+BNT162b2 | Severe COVID-19    | 97.2 (93.7, 98.7) | Omicron        |
|                         |              |             | EP       | 2 CoronaVac+BNT162b2 | Death              | 95.2 (80.5, 98.8) | Omicron        |
| AlHosani, 2022          | Cohort       | United Arab | GP       | 2 BBIBP-CorV         | Hospitalization    | 79.8 (78.0, 81.4) | Alpha and Beta |

|                          |              |                      |  |     |              |                    |                      |                                            |
|--------------------------|--------------|----------------------|--|-----|--------------|--------------------|----------------------|--------------------------------------------|
|                          |              | Emirates             |  | GP  | 2 BBIBP-CorV | ICU admission      | 92.2 (89.7, 94.1)    | Alpha and Beta                             |
|                          |              |                      |  | GP  | 2 BBIBP-CorV | Death              | 97.1 (83.0, 99.9)    | Alpha and Beta                             |
| Jara, 2021               | Cohort       | Chile                |  | GP  | 2 CoronaVac  | COVID-19 infection | 65.9 (65.2, 66.6)    | Alpha and Gamma                            |
|                          |              |                      |  | GP  | 2 CoronaVac  | Hospitalization    | 87.5 (86.7, 88.2)    | Alpha and Gamma                            |
|                          |              |                      |  | GP  | 2 CoronaVac  | ICU admission      | 90.3 (89.1, 91.4)    | Alpha and Gamma                            |
|                          |              |                      |  | GP  | 2 CoronaVac  | Death              | 86.3 (84.5, 87.9)    | Alpha and Gamma                            |
| Rearte, 2022             | Case-control | Argentina            |  | EP  | 2 BBIBP-CorV | COVID-19 infection | 44.0 (42.0, 45.0)    | Alpha, Gamma and Lambda                    |
|                          |              |                      |  | EP  | 2 BBIBP-CorV | Death              | 85.0 (84.0, 86.0)    | Alpha, Gamma and Lambda                    |
| Al Kaabi, 2022           | Cohort       | United Arab Emirates |  | GP  | 2 BBIBP-CorV | Hospitalization    | 79.6 (77.7, 81.3)    | Alpha and Delta                            |
|                          |              |                      |  |     | 2 BBIBP-CorV | ICU admission      | 86.0 (82.2, 89.0)    | Alpha and Delta                            |
|                          |              |                      |  |     | 2 BBIBP-CorV | Death              | 84.1 (70.8, 91.3)    | Alpha and Delta                            |
| Suah, 2021               | Cohort       | Malaysia             |  | GP  | 2 CoronaVac  | ICU admission      | 72.0 (69.9, 73.9)    | Beta and Delta                             |
|                          |              |                      |  | GP  | 2 CoronaVac  | Death              | 82.4 (81.0, 83.7)    | Beta and Delta                             |
| Nadeem, 2022             | Case-control | Pakistan             |  | EP  | 2 BBIBP-CorV | COVID-19 infection | 94.3 (92.2, 95.9)    | Beta, Gamma, and Delta                     |
|                          |              |                      |  | EP  | 2 BBIBP-CorV | Hospitalization    | 60.5 (7.9, 82.9)     | Beta, Gamma, and Delta                     |
|                          |              |                      |  |     | 2 BBIBP-CorV | Death              | 98.6 (94.2, 99.6)    | Beta, Gamma, and Delta                     |
| Edith Solis-Castro, 2022 | Cohort       | Peru                 |  | HCW | 2 BBIBP-CorV | COVID-19 infection | 26.3 (23.8, 28.6)    | Lambda and Gamma                           |
|                          |              |                      |  |     | 2 BBIBP-CorV | Hospitalization    | 67.7 (60.1, 73.8)    | Lambda and Gamma                           |
|                          |              |                      |  |     | 2 BBIBP-CorV | Death              | 90.9 (85.5, 94.2)    | Lambda and Gamma                           |
| Paternina-Caicedo, 2022  | Cohort       | Colombia             |  | GP  | 2 CoronaVac  | COVID-19 infection | -44.0 (-54.1, -34.6) | Alpha, Gamma, Delta, Lambda, and Mu (>50%) |
|                          |              |                      |  |     | 2 CoronaVac  | Hospitalization    | 3.3 (-15.1, 18.7)    | Alpha, Gamma, Delta, Lambda, and Mu (>50%) |
|                          |              |                      |  |     | 2 CoronaVac  | ICU admission      | 18.0 (-10.6, 39.2)   | Alpha, Gamma, Delta, Lambda, and Mu (>50%) |
|                          |              |                      |  |     | 2 CoronaVac  | Death              | 21.4 (-0.7, 38.6)    | Alpha, Gamma, Delta,                       |

|                          |        |          |    |              |                 |                   |                       |
|--------------------------|--------|----------|----|--------------|-----------------|-------------------|-----------------------|
| Arregocés-Castillo, 2022 | Cohort | Colombia | EP | 2 BBIBP-CorV | Hospitalization | 79.6 (77.7, 81.3) | Lambda, and Mu (>50%) |
|                          |        |          |    | 2 BBIBP-CorV | ICU admission   | 86.0 (82.2, 89.0) | Mu (B.1.621)          |
|                          |        |          |    | 2 BBIBP-CorV | Death           | 84.1 (70.8, 91.3) | Mu (B.1.621)          |

Study ID consisted of the first author's surname and year of publication; different immunization regimens in the same study were named by adding letters after the year (a,b,c,d,e, etc.); different studies by the same author in the same year of publication were named by adding Arabic numerals after the surname (1,2,3,4,5, etc.).

Abbreviations: VE, vaccine effectiveness; CI, confidence interval; HCWs, healthcare workers; GP, general population; EP, elderly people; CCs, Close contacts; GS, genome sequencing.

**Supplement table 10. Vaccine effectiveness of immunization regimens against Alpha and Gamma variants.**

| <b>Outcomes</b>                         | <b>Study (n)</b> | <b>VE% (95% CI)</b>  | <b>I<sup>2</sup> (%)</b> | <b>p value</b> |
|-----------------------------------------|------------------|----------------------|--------------------------|----------------|
| <b>Alpha</b>                            |                  |                      |                          |                |
| <b>COVID-19 related hospitalization</b> |                  |                      |                          |                |
| Two doses of inactivated vaccines       | 1                | 88.50 (86.05, 90.95) | NA                       | NA             |
| <b>COVID-19 related death</b>           |                  |                      |                          |                |
| Two doses of inactivated vaccines       | 1                | 86.00 (83.90, 88.10) | NA                       | NA             |
| <b>Severe COVID-19</b>                  |                  |                      |                          |                |
| Two doses of inactivated vaccines       | 1                | 90.50 (89.00, 92.00) | NA                       | NA             |
| <b>Gamma</b>                            |                  |                      |                          |                |
| <b>COVID-19 related hospitalization</b> |                  |                      |                          |                |
| Two doses of inactivated vaccines       | 1                | 55.50 (47.30, 63.70) | NA                       | NA             |
| <b>COVID-19 related death</b>           |                  |                      |                          |                |
| Two doses of inactivated vaccines       | 1                | 61.20 (50.40, 72.00) | NA                       | NA             |

Abbreviations: VE, vaccine effectiveness; CI, confidence interval; NA, not applicable. p value for heterogeneity.

**Supplement table 11. Vaccine effectiveness of immunization regimens against Delta variants.**

| <b>Outcomes</b>                                         | <b>Study (n)</b> | <b>VE% (95% CI)</b>   | <b>I<sup>2</sup> (%)</b> | <b>p value</b> |
|---------------------------------------------------------|------------------|-----------------------|--------------------------|----------------|
| <b>COVID-19 related hospitalization</b>                 |                  |                       |                          |                |
| <b>Overall</b>                                          | 2                | 91.05 (88.18, 93.93)  | 96.7                     | <0.001         |
| Two doses of inactivated vaccines                       | 1                | 53.80 (44.80, 62.80)  | NA                       | NA             |
| Homologous booster of inactivated vaccines              | 2                | 85.08 (79.11, 91.04)  | 23.9                     | 0.252          |
| Heterologous booster of mRNA vaccines                   | 2                | 95.39 (94.15, 96.64)  | 55.5                     | 0.106          |
| Heterologous booster of non-replicating vector vaccines | 2                | 97.67 (97.11, 98.22)  | 1.7                      | 0.313          |
| <b>COVID-19 related ICU admission</b>                   |                  |                       |                          |                |
| <b>Overall</b>                                          | 1                | 96.10 (93.04, 99.15)  | 93.9                     | <0.001         |
| Homologous booster of inactivated vaccines              | 1                | 92.20 (89.25, 95.15)  | NA                       | NA             |
| Heterologous booster of mRNA vaccines                   | 1                | 96.20 (94.85, 97.55)  | NA                       | NA             |
| Heterologous booster of non-replicating vector vaccines | 1                | 98.90 (98.55, 99.25)  | NA                       | NA             |
| <b>COVID-19 related death</b>                           |                  |                       |                          |                |
| <b>Overall</b>                                          | 2                | 94.90 (92.05, 97.75)  | 79.8                     | <0.001         |
| Two doses of inactivated vaccines                       | 1                | 67.40 (45.75, 89.05)  | NA                       | NA             |
| Homologous booster of inactivated vaccines              | 2                | 86.82 (81.64, 92.00)  | 0.0                      | 0.785          |
| Heterologous booster of mRNA vaccines                   | 2                | 96.32 (94.82, 97.82)  | 0.0                      | 0.557          |
| Heterologous booster of non-replicating vector vaccines | 2                | 98.10 (97.45, 98.74)  | 0.0                      | 0.759          |
| <b>Severe COVID-19</b>                                  |                  |                       |                          |                |
| <b>Overall</b>                                          | 5                | 95.97 (89.89, 102.05) | 94.2                     | <0.001         |
| Two doses of inactivated vaccines                       | 4                | 93.36 (81.77, 104.95) | 96.5                     | <0.001         |
| Heterologous booster of mRNA vaccines                   | 1                | 98.90 (95.05, 102.75) | NA                       | NA             |
| Heterologous booster of non-replicating vector vaccines | 1                | 99.10 (95.95, 102.25) | NA                       | NA             |

Abbreviations: VE, vaccine effectiveness; CI, confidence interval; NA, not applicable. p value for heterogeneity.

**Supplement table 12. Vaccine effectiveness of immunization regimens against Omicron variants.**

| <b>Outcomes</b>                            | <b>Study (n)</b> | <b>VE% (95% CI)</b>   | <b>I<sup>2</sup> (%)</b> | <b>p value</b> |
|--------------------------------------------|------------------|-----------------------|--------------------------|----------------|
| <b>COVID-19 related hospitalization</b>    |                  |                       |                          |                |
| Two doses of inactivated vaccines          | 3                | 70.55 (61.46, 79.65)  | 13.8                     | 0.314          |
| <b>COVID-19 related ICU admission</b>      |                  |                       |                          |                |
| Two doses of inactivated vaccines          | 1                | 69.00 (34.20, 103.80) | NA                       | NA             |
| <b>COVID-19 related death</b>              |                  |                       |                          |                |
| <b>Overall</b>                             | 2                | 85.29 (77.47, 93.12)  | 99.0                     | <0.001         |
| Two doses of inactivated vaccines          | 2                | 71.46 (64.60, 78.31)  | 90.4                     | 0.001          |
| Homologous booster of inactivated vaccines | 1                | 95.50 (93.95, 97.05)  | NA                       | NA             |
| Heterologous booster of mRNA vaccines      | 2                | 93.79 (87.32, 100.25) | 95.9                     | <0.001         |
| <b>Severe COVID-19</b>                     |                  |                       |                          |                |
| <b>Overall</b>                             | 3                | 75.71 (61.83, 89.59)  | 99.2                     | <0.001         |
| Two doses of inactivated vaccines          | 3                | 62.31 (57.64, 66.97)  | 37.5                     | 0.202          |
| Homologous booster of inactivated vaccines | 1                | 88.00 (82.15, 93.85)  | NA                       | NA             |
| Heterologous booster of mRNA vaccines      | 2                | 90.47 (86.49, 94.44)  | 30.0                     | 0.232          |

Abbreviations: VE, vaccine effectiveness; CI, confidence interval; NA, not applicable. p value for heterogeneity.

**Supplement table 13. Subgroup analysis of different populations.**

| <b>Outcomes</b>                                         | <b>Study (n)</b> | <b>VE% (95% CI)</b>   | <b>I<sup>2</sup> (%)</b> | <b>p value</b> |
|---------------------------------------------------------|------------------|-----------------------|--------------------------|----------------|
| <b>Children aged &lt;18 years</b>                       |                  |                       |                          |                |
| <b>COVID-19 related hospitalization</b>                 |                  |                       |                          |                |
| Two doses of inactivated vaccines                       | 3                | 70.55 (61.46, 79.65)  | 13.8                     | 0.314          |
| <b>COVID-19 related ICU admission</b>                   |                  |                       |                          |                |
| Two doses of inactivated vaccines                       | 1                | 69.00 (34.20, 103.80) | NA                       | NA             |
| <b>General population</b>                               |                  |                       |                          |                |
| <b>COVID-19 related hospitalization</b>                 |                  |                       |                          |                |
| <b>Overall</b>                                          | 10               | 83.43 (78.91, 87.96)  | 99.6                     | <0.001         |
| Two doses of inactivated vaccines                       | 9                | 75.52 (70.98, 80.07)  | 98.7                     | <0.001         |
| Homologous booster of inactivated vaccines              | 2                | 85.08 (79.11, 91.04)  | 23.9                     | 0.252          |
| Heterologous booster of mRNA vaccines                   | 3                | 95.94 (94.70, 97.18)  | 73.7                     | 0.010          |
| Heterologous booster of non-replicating vector vaccines | 2                | 97.67 (97.11, 98.22)  | 1.7                      | 0.313          |
| <b>COVID-19 related ICU admission</b>                   |                  |                       |                          |                |
| <b>Overall</b>                                          | 7                | 82.64 (76.05, 89.24)  | 99.4                     | <0.001         |
| Two doses of inactivated vaccines                       | 6                | 74.05 (63.93, 84.18)  | 98.9                     | <0.001         |
| Homologous booster of inactivated vaccines              | 1                | 92.20 (89.25, 95.15)  | NA                       | NA             |
| Heterologous booster of mRNA vaccines                   | 1                | 96.20 (94.85, 97.55)  | NA                       | NA             |
| Heterologous booster of non-replicating vector vaccines | 1                | 98.90 (98.55, 99.25)  | NA                       | NA             |
| <b>COVID-19 related death</b>                           |                  |                       |                          |                |
| <b>Overall</b>                                          | 12               | 86.29 (82.58, 90.00)  | 98.8                     | <0.001         |
| Two doses of inactivated vaccines                       | 11               | 81.61 (78.73, 84.48)  | 93.8                     | <0.001         |
| Homologous booster of inactivated vaccines              | 2                | 86.82 (81.64, 92.00)  | 0.0                      | 0.785          |
| Heterologous booster of mRNA vaccines                   | 4                | 95.36 (90.92, 99.80)  | 97.3                     | <0.001         |
| Heterologous booster of non-replicating vector vaccines | 2                | 98.10 (97.45, 98.74)  | 0.0                      | 0.759          |
| <b>Severe COVID-19</b>                                  |                  |                       |                          |                |
| <b>Overall</b>                                          | 4                | 85.55 (79.02, 92.07)  | 99.5                     | <0.001         |
| Two doses of inactivated vaccines                       | 3                | 73.62 (62.42, 84.81)  | 99.2                     | <0.001         |
| Heterologous booster of mRNA vaccines                   | 3                | 95.12 (88.89, 101.35) | 98.8                     | <0.001         |
| Heterologous booster of non-replicating vector vaccines | 1                | 99.10 (95.95, 102.25) | NA                       | NA             |
| <b>Elderly people aged ≥60 years</b>                    |                  |                       |                          |                |
| <b>COVID-19 related hospitalization</b>                 |                  |                       |                          |                |
| Two doses of inactivated vaccines                       | 3                | 50.83 (44.21, 57.44)  | 34.6                     | 0.217          |
| <b>COVID-19 related death</b>                           |                  |                       |                          |                |
| <b>Overall</b>                                          | 5                | 84.19 (76.54, 91.85)  | 99.1                     | <0.001         |
| Two doses of inactivated vaccines                       | 5                | 79.17 (70.44, 87.89)  | 98.8                     | <0.001         |
| Homologous booster of inactivated vaccines              | 1                | 95.50 (93.95, 97.05)  | NA                       | NA             |
| Heterologous booster of mRNA vaccines                   | 1                | 97.20 (94.70, 99.70)  | NA                       | NA             |
| <b>Severe COVID-19</b>                                  |                  |                       |                          |                |

|                                            |   |                       |      |        |
|--------------------------------------------|---|-----------------------|------|--------|
| <b>Overall</b>                             | 2 | 83.30 (71.10, 95.50)  | 95.1 | <0.001 |
| Two doses of inactivated vaccines          | 2 | 74.95 (43.98, 105.91) | 98.3 | <0.001 |
| Homologous booster of inactivated vaccines | 1 | 88.00 (82.15, 93.85)  | NA   | NA     |
| Heterologous booster of mRNA vaccines      | 1 | 95.20 (86.05, 104.35) | NA   | NA     |
| <b>Healthcare workers</b>                  |   |                       |      |        |
| <b>COVID-19 related hospitalization</b>    |   |                       |      |        |
| Two doses of inactivated vaccines          | 1 | 67.70 (60.85, 74.55)  | NA   | NA     |
| <b>COVID-19 related death</b>              |   |                       |      |        |
| Two doses of inactivated vaccines          | 1 | 90.90 (86.55, 96.25)  | NA   | NA     |
| <b>Close contacts</b>                      |   |                       |      |        |
| <b>Severe COVID-19</b>                     |   |                       |      |        |
| Two doses of inactivated vaccines          | 3 | 99.99 (99.19, 100.79) | 0.0  | 0.656  |

Abbreviations: VE, vaccine effectiveness; CI, confidence interval; NA, not applicable.



**Supplement figure 6. Funnel plots to assess publication bias.**

(a) Funnel plot of COVID-19 infection (t value of Egger's test = -2.80, p=0.008).

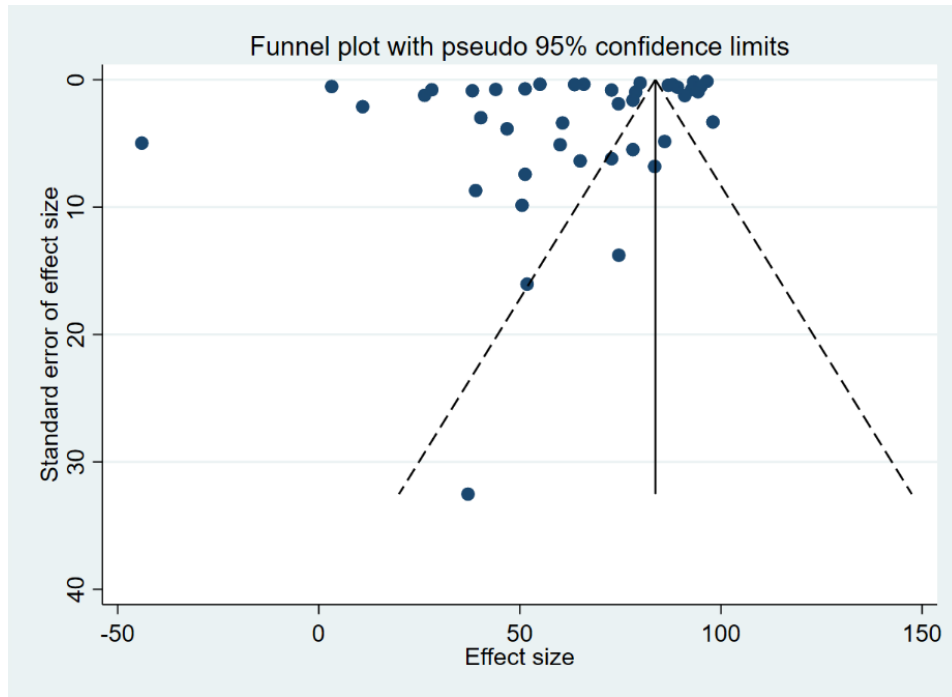

(b) Funnel plot of COVID-19 related hospitalization (t value of Egger's test = -2.17, p=0.041).

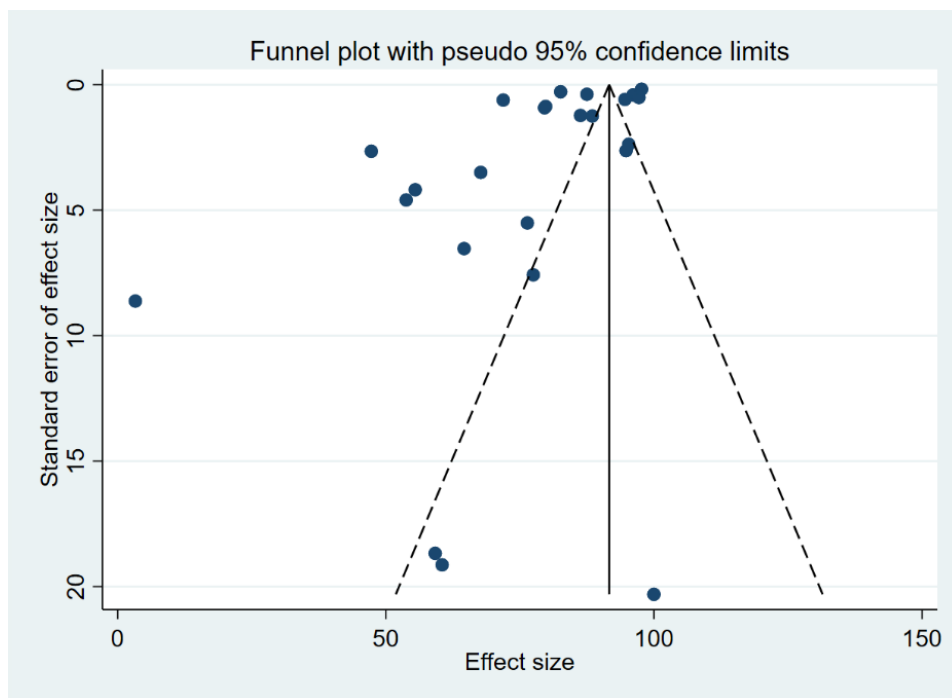

(c) Funnel plot of COVID-19 related ICU admission (t value of Egger's test = -3.10, p=0.015).

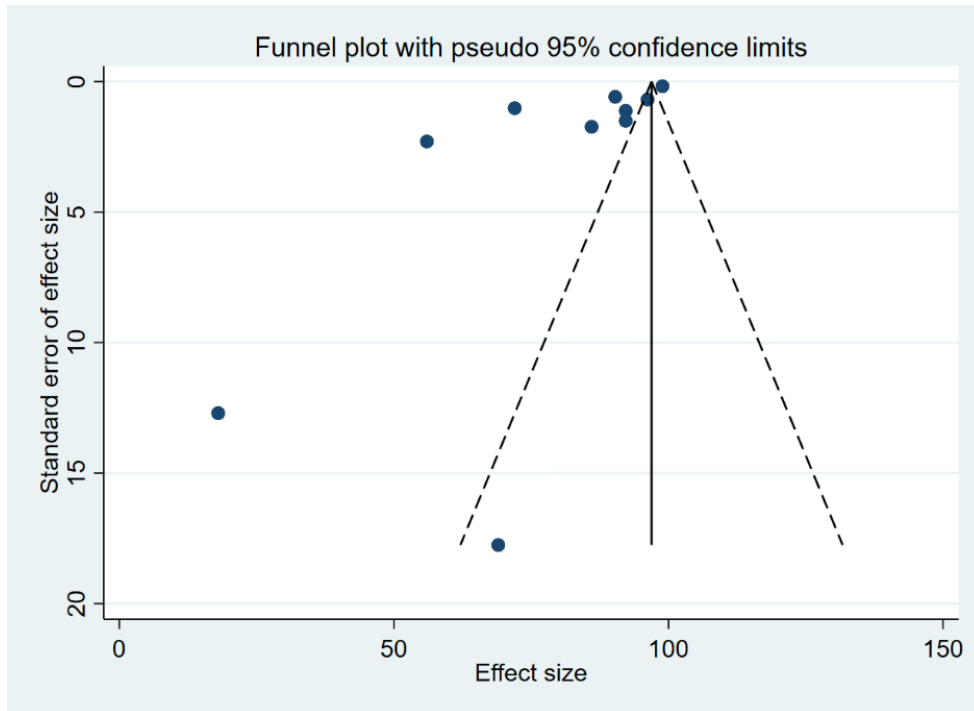

(d) Funnel plot of COVID-19 related death (t value of Egger's test = -1.23, p=0.229).

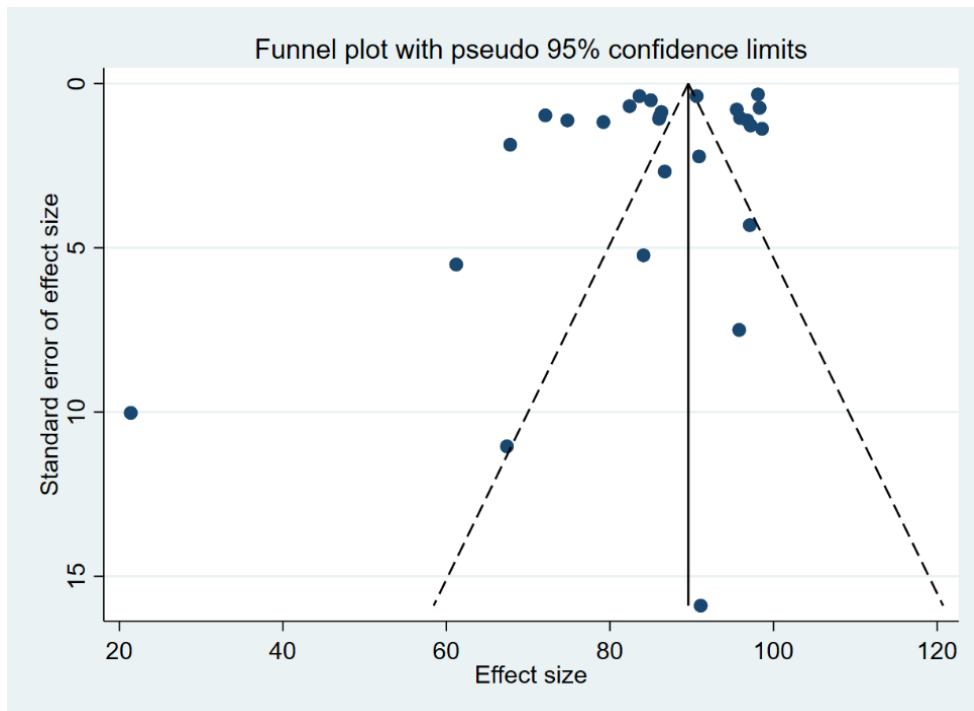

(e) Funnel plot of severe COVID-19 infection (t value of Egger's test = -0.07, p=0.947).

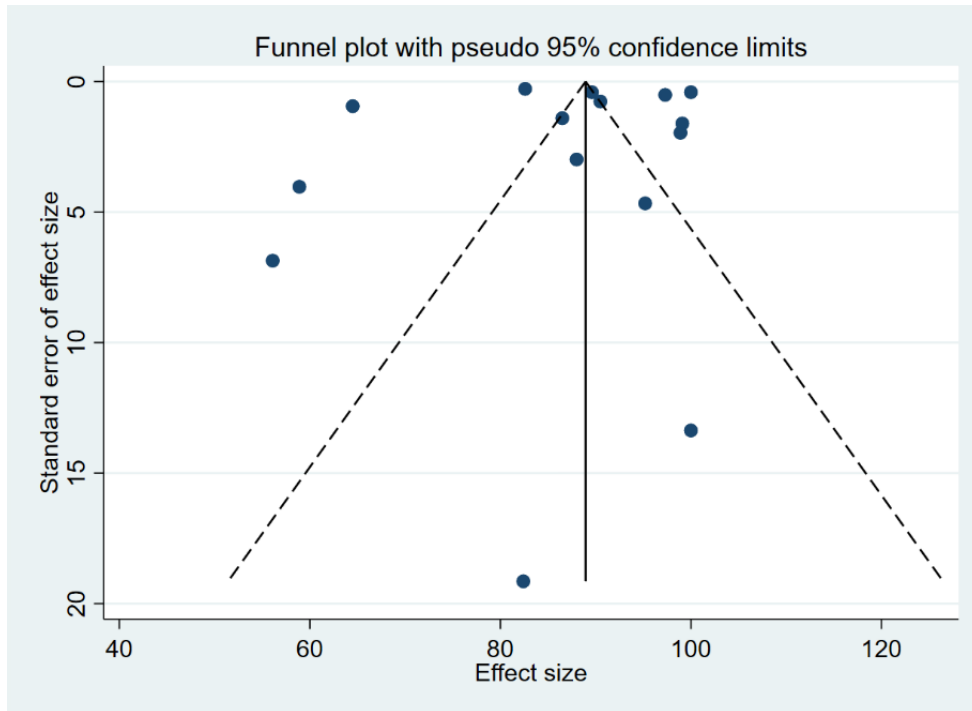

**Supplement figure 7. Sensitivity analysis.**

(a) Sensitivity analysis of VE for prevention of COVID-19 infection.

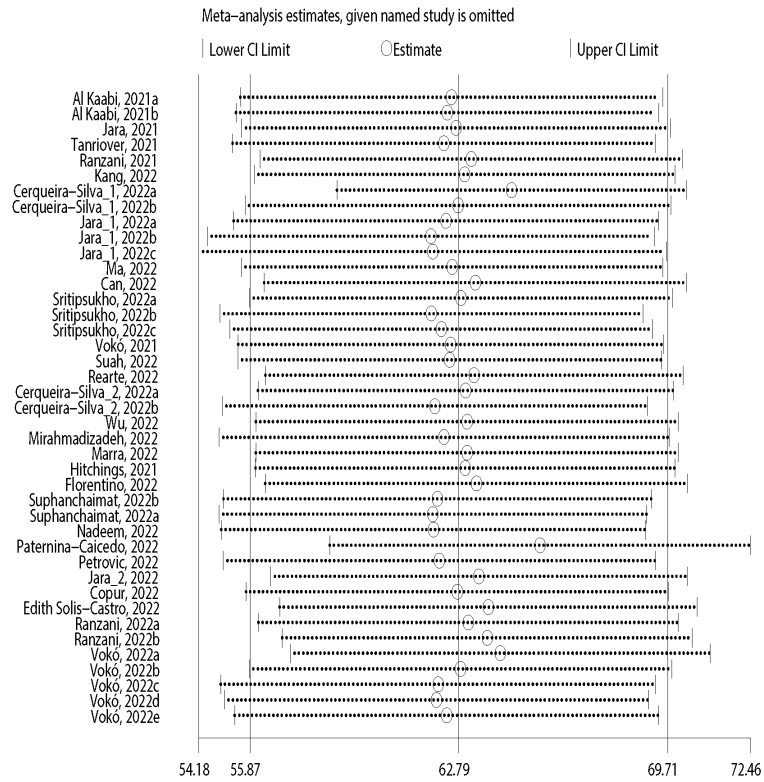

(b) Sensitivity analysis of VE for prevention of COVID-19 related hospitalization.

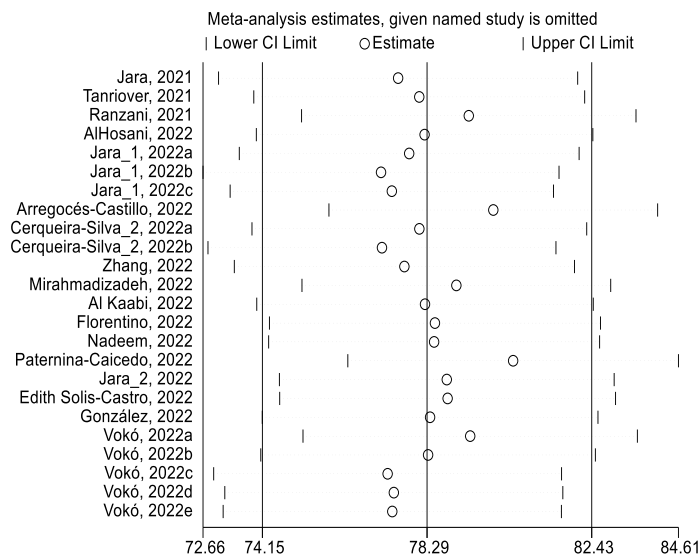

(c) Sensitivity analysis of VE for prevention of COVID-19 related ICU admission.

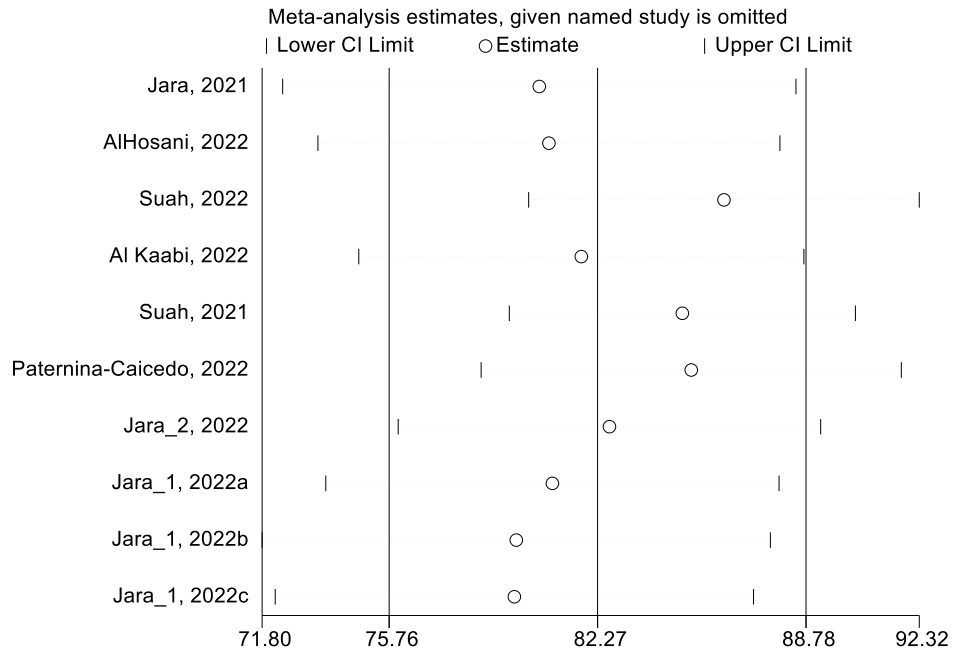

(d) Sensitivity analysis of VE for prevention of COVID-19 related death.

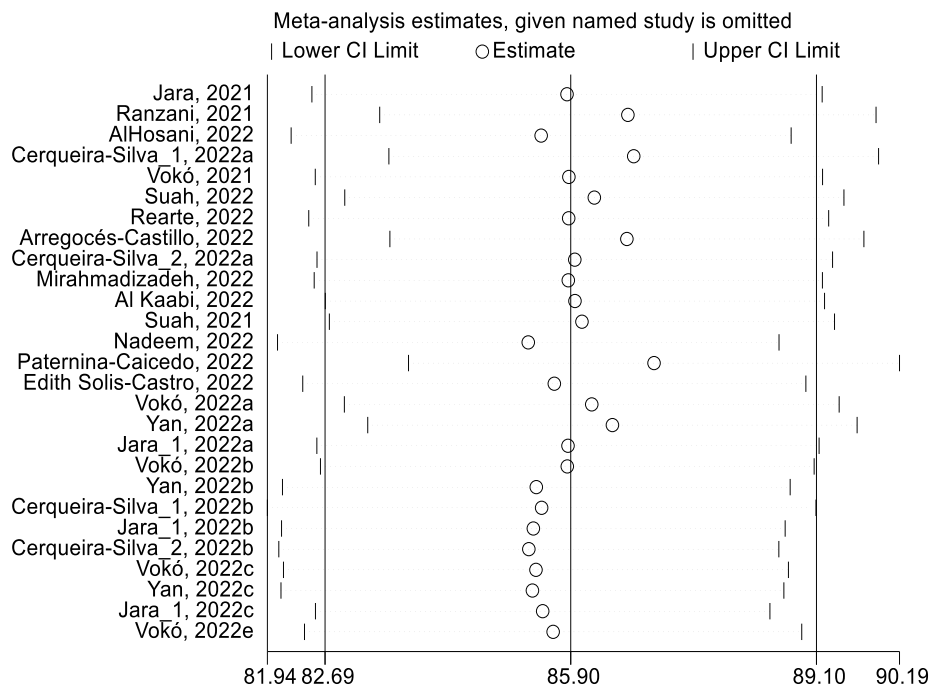

(e) Sensitivity analysis of VE for prevention of severe COVID-19 infection.

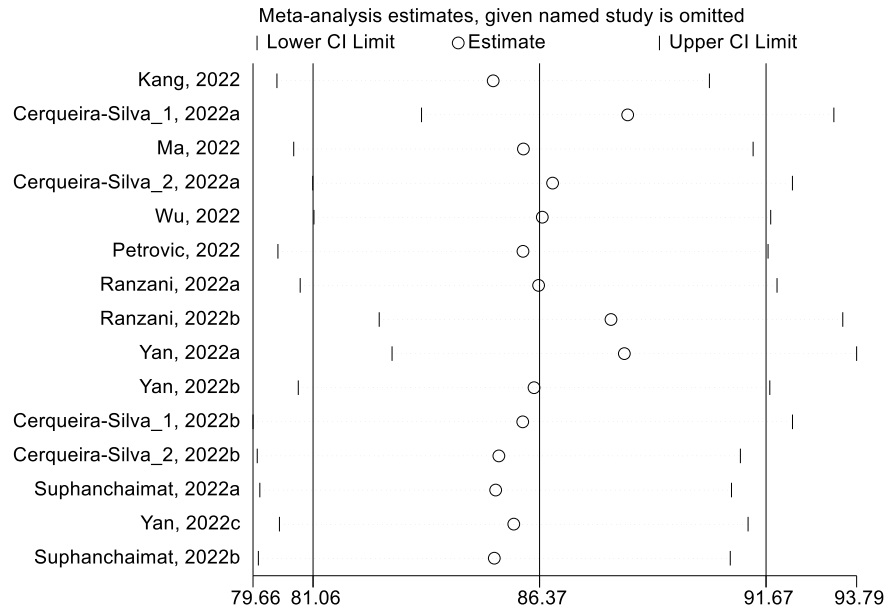

Supplement: KHVI_A_2221146_SM7772.pdf [file KHVI_A_2221146_SM7772.pdf]
